# Supplementary material for: Role of biofuels, electro-fuels, and blue fuels for shipping: environmental and economic life cycle considerations
Source: Royal Society of Chemistry journal article supplement (doi:10.1039/d4ee01641f), 2024-01-01
Supplement: d4ee01641f1.zip [file d4ee01641f1.zip]

## Sheet: LCC
LCC	P1: BE	P2: eNH3ICE	P3: eNH3FC	P4: eMeOHICE	P5: eMeOHFC	P6: eLH2ICE	P7: eLH2FC	P8: eLMGICE	P9: eLMGFC	P10: bioLH2ICE	P11: bioLH2FC	P12: bioMeOHICE	P13: bioMeOHFC	P14: bioNH3ICE	P15: bioNH3FC	P16: bioLMGICE	P17: bioLMGFC	P18: blueNH3ICE	P19: blueNH3FC	P20: blueLH2ICE	P21: blueLH2FC	P22: LNGICEOCC	P23: MGOICEOCC	P24: LNGICE	P25: MGOICE
Manufacturing cost	1.32387e+08	656224	1.76895e+06	512672	1.66125e+06	5.58104e+06	5.53854e+06	699237	1.81383e+06	5.58104e+06	5.53854e+06	512672	1.66125e+06	656224	1.76895e+06	699237	1.81383e+06	656224	1.76895e+06	5.58104e+06	5.53854e+06	1.31157e+06	1.27091e+06	699237	383461
Fuel cost	1.29573e+06	5.85256e+06	4.84452e+06	6.44467e+06	5.78024e+06	5.25268e+06	5.01636e+06	6.31017e+06	5.46869e+06	4.93413e+06	4.70485e+06	3.55179e+06	3.13512e+06	5.46558e+06	4.51731e+06	3.51106e+06	2.99461e+06	4.33122e+06	3.55818e+06	3.26918e+06	3.07667e+06	1.89716e+06	2.68366e+06	1.75367e+06	2.32268e+06
Opex	5394	242041	83750.8	219974	67194.4	999106	794437	248653	90649.3	999106	794437	219974	67194.4	159474	83750.8	248653	90649.3	159474	83750.8	999106	794437	479079	517631	248653	187418
Replacement cost	2.64633e+08	24504.8	1.49514e+06	24504.8	1.49514e+06	24504.8	671048	24504.8	1.49514e+06	24504.8	671048	24504.8	1.49514e+06	24504.8	1.49514e+06	24504.8	1.49514e+06	24504.8	1.49514e+06	24504.8	671048	24537	24537	24504.8	24504.8
Fuel distribution cost	951584	213647	171762	99178.4	85881.2	2.31416e+06	2.14318e+06	775244	648928	2.31416e+06	2.14318e+06	99178.4	85881.2	213647	171762	775244	648928	213647	171762	2.31416e+06	2.14318e+06	838715	38197.5	775244	33059.5
ship cost	2.29633e+06	2.29633e+06	2.29633e+06	2.29633e+06	2.29633e+06	2.29633e+06	2.29633e+06	2.29633e+06	2.29633e+06	2.29633e+06	2.29633e+06	2.29633e+06	2.29633e+06	2.29633e+06	2.29633e+06	2.29633e+06	2.29633e+06	2.29633e+06	2.29633e+06	2.29633e+06	2.29633e+06	2.29633e+06	2.29633e+06	2.29633e+06	2.29633e+06
Total LCC value	4.01569e+08	9.28531e+06	1.06605e+07	9.59733e+06	1.1386e+07	1.64678e+07	1.64599e+07	1.03541e+07	1.18136e+07	1.61493e+07	1.61484e+07	6.70445e+06	8.74091e+06	8.81576e+06	1.03333e+07	7.55503e+06	9.33949e+06	7.6814e+06	9.37411e+06	1.44843e+07	1.45202e+07	6.84739e+06	6.83127e+06	5.79764e+06	5.24745e+06
Lower LCC	6.40843e+07	1.07045e+06	1.3208e+06	1.22025e+06	1.47963e+06	971163	1.19939e+06	1.18893e+06	1.44573e+06	811547	1.03954e+06	499816	901478	836764	1.1485e+06	680483	1.12756e+06	246228	686811	721087	974329	102698	218667	115211	230747
Higher LCC	2.40928e+08	1.84918e+06	1.92167e+06	1.82743e+06	1.96132e+06	3.5427e+06	3.55969e+06	1.83612e+06	1.95779e+06	3.51449e+06	3.53169e+06	1.68318e+06	1.96139e+06	1.73122e+06	1.88225e+06	1.19529e+06	1.57796e+06	2.18387e+06	2.24719e+06	3.28172e+06	3.31271e+06	1.38757e+06	1.22346e+06	1.06404e+06	777247
CAC	-5030	270	330	290	380	760	690	400	440	900	800	110	240	270	340	210	310	290	380	1030	880	160	150	0	0
CAC-25percentile	-7037.32	220.231	276.746	231.328	318.526	743.418	664.115	335.894	380.527	895.039	778.847	88.6856	204.788	267.297	323.763	159.232	248.626	313.216	368.465	1006.81	839.556	157.959	153.489	0	0
CAC-75percentile	-4890.25	339.689	381.933	353.377	433.47	903.844	820.281	480.366	504.673	1087.39	963.583	182.345	308.868	399.708	442.804	260.465	355.264	503.21	522.565	1258.98	1071.09	242.914	194.248	0	0

## Sheet: fuelcost
fuelcost	eNH3	eLH2	eLMG	eMeOH	bioNH3	bioLH2	bioLMG	bioMeOH	blueNH3	blueLH2	LNG	MGO
Electricity	25.7538	24.0938	28.6033	28.9224	3.02935	3.86544	1.33352	0.854523	3.26726	2.7403	0	0
Capex & Opex	8.09191	8.67479	10.9206	11.4607	13.945	13.885	8.59773	9.35518	9.60312	7.4444	0	0
Biomass	0	0	0	0	14.5854	12.9832	11.7117	11.6935	0	0	0	0
Natural gas	0	0	0	0	0	0	0	0	11.9884	9.91315	10.4167	0
Marine oil	0	0	0	0	0	0	0	0	0	0	0	14.0515
Total cost	33.8457	32.7685	39.5239	40.3831	31.5598	30.7337	21.643	21.9032	24.8588	20.0979	10.4167	14.0515
Lower limit	7.02612	6.64149	8.35924	8.37661	5.57068	5.17307	4.98669	3.73512	2.03183	3.16045	1.24841	1.64132
Higher limit	9.87392	9.06926	10.5432	10.7372	9.16063	8.27468	6.3257	9.82363	11.8396	5.23819	5.39813	3.98111

## Sheet: GWP
GWP	P1: BE	P2: eNH3ICE	P3: eNH3FC	P4: eMeOHICE	P5: eMeOHFC	P6: eLH2ICE	P7: eLH2FC	P8: eLMGICE	P9: eLMGFC	P10: bioLH2ICE	P11: bioLH2FC	P12: bioMeOHICE	P13: bioMeOHFC	P14: bioNH3ICE	P15: bioNH3FC	P16: bioLMGICE	P17: bioLMGFC	P18: blueNH3ICE	P19: blueNH3FC	P20: blueLH2ICE	P21: blueLH2FC	P22: LNGICEOCC	P23: MGOICEOCC	P24: LNGICE	P25: MGOICE
Manufacturing	3.21007e+07	165452	177932	95329.4	124926	457766	438399	148342	167731	457766	438399	95329.4	124926	165452	177932	148342	167731	165452	177932	457766	438399	260522	216614	148342	69307.9
Well-to-tank	232549	1.35608e+06	1.01632e+06	-9.37408e+06	-8.71215e+06	1.12303e+06	947541	-5.62349e+06	-5.10669e+06	3.8511e+06	3.61535e+06	-7.48484e+06	-6.98472e+06	2.95798e+06	2.37078e+06	-3.9277e+06	-3.60781e+06	7.85006e+06	6.50721e+06	6.94175e+06	6.63774e+06	4.06096e+06	3.36138e+06	3.75352e+06	2.90923e+06
Tank-to-wake	0	1.25054e+06	0	1.19904e+07	1.00334e+07	1.25961e+06	0	1.0325e+07	7.71801e+06	1.25961e+06	0	1.19904e+07	1.00334e+07	1.25054e+06	0	1.0325e+07	7.71801e+06	1.25054e+06	0	1.25961e+06	0	3.41633e+06	3.6963e+06	1.03817e+07	1.46868e+07
Replacement	6.41895e+07	4432.33	30244.6	4432.33	30244.6	4432.33	11234.1	4432.33	30244.6	4432.33	11234.1	4432.33	4432.33	4432.33	30244.6	4432.33	30244.6	4432.33	30244.6	4432.33	11234.1	4444.8	4444.8	4432.33	4432.33
Ship structure	1.27676e+06	1.27676e+06	1.27676e+06	1.27676e+06	1.27676e+06	1.27676e+06	1.27676e+06	1.27676e+06	1.27676e+06	1.27676e+06	1.27676e+06	1.27676e+06	1.27676e+06	1.27676e+06	1.27676e+06	1.27676e+06	1.27676e+06	1.27676e+06	1.27676e+06	1.27676e+06	1.27676e+06	1.27676e+06	1.27676e+06	1.27676e+06	1.27676e+06
Total	9.77995e+07	4.05326e+06	2.50126e+06	3.9928e+06	2.75319e+06	4.1216e+06	2.67393e+06	6.131e+06	4.08606e+06	6.84966e+06	5.34174e+06	5.88203e+06	4.48063e+06	5.65516e+06	3.85572e+06	7.82679e+06	5.58493e+06	1.05472e+07	7.99214e+06	9.94032e+06	8.36413e+06	9.01901e+06	8.55549e+06	1.55647e+07	1.89465e+07
Lower limit	1.33459e+07	223527	40666.7	256598	237430	42662.1	42290.5	167076	170259	224344	220922	270883	253033	-1.62009e+06	-1.39951e+06	206446	211384	-1193.79	29737.2	431593	424641	571684	813573	76224.8	78781.2
Upper limit	1.8302e+07	429805	45976.9	271696	241969	59520.3	55107.6	558352	411262	315675	304722	300505	268571	2.52616e+06	1.93372e+06	621042	469609	1.7347e+06	1.33002e+06	443145	429703	755471	826583	238626	85545

## Sheet: AP
AP	P1: BE	P2: eNH3ICE	P3: eNH3FC	P4: eMeOHICE	P5: eMeOHFC	P6: eLH2ICE	P7: eLH2FC	P8: eLMGICE	P9: eLMGFC	P10: bioLH2ICE	P11: bioLH2FC	P12: bioMeOHICE	P13: bioMeOHFC	P14: bioNH3ICE	P15: bioNH3FC	P16: bioLMGICE	P17: bioLMGFC	P18: blueNH3ICE	P19: blueNH3FC	P20: blueLH2ICE	P21: blueLH2FC	P22: LNGICEOCC	P23: MGOICEOCC	P24: LNGICE	P25: MGOICE
Manufacturing	184139	934.065	1944.3	504.489	1619.58	2724.81	4402.06	829.247	1881.81	2724.81	4402.06	504.489	1619.58	934.065	1944.3	829.247	1881.81	934.065	1944.3	2724.81	4402.06	1558.19	1289.16	829.247	345.079
Well-to-tank	828.005	88618.7	73763.3	9491.76	7417.01	7113.24	5606.58	11118	8607.19	107329	103609	94982.6	85586.2	159591	133773	109421	95494.7	225415	189429	14180.5	12517.8	12215.3	30103.8	11293	26054.5
Tank-to-wake	0	57103	53.6519	58552.9	13.8456	54817.8	0	54400.4	13.8456	54817.8	0	58552.9	13.8456	57103	53.6519	54400.4	13.8456	57103	53.6519	54817.8	0	57331.9	74855.6	54400.4	68246.6
Replacement	368008	27.6339	860.676	27.6339	860.676	27.6339	142.741	27.6339	860.676	27.6339	142.741	27.6339	27.6339	27.6339	860.676	27.6339	860.676	27.6339	860.676	27.6339	142.741	27.7116	27.7116	27.6339	27.6339
Ship structure	6096.48	6096.48	6096.48	6096.48	6096.48	6096.48	6096.48	6096.48	6096.48	6096.48	6096.48	6096.48	6096.48	6096.48	6096.48	6096.48	6096.48	6096.48	6096.48	6096.48	6096.48	6096.48	6096.48	6096.48	6096.48
Total	559071	152780	82718.4	74673.2	16007.6	70779.9	16247.9	72471.8	17460	170995	114250	160164	94176.8	223752	142728	170774	104348	289576	198385	77847.2	23159.1	77229.6	112373	72646.8	100770
Lower limit	76513.8	2402.36	2238.2	261.97	588.134	258.334	264.867	314.931	611.628	2953.77	3027.31	2562.73	2548.21	4312.34	3848.79	2959.27	2748.27	6084.22	5338.79	447.843	451.933	342.12	770.259	53.0761	703.517
Upper limit	104928	2609.31	1857.76	284.392	98.2203	279.903	217.888	341.166	121.211	3206.69	3149.14	2783.46	2187.8	4683.85	3557.07	3214.38	2383.53	6607.88	5133.81	487.442	417.387	379.417	835.174	57.3973	763.865

## Sheet: ETOXF
ETOXF	P1: BE	P2: eNH3ICE	P3: eNH3FC	P4: eMeOHICE	P5: eMeOHFC	P6: eLH2ICE	P7: eLH2FC	P8: eLMGICE	P9: eLMGFC	P10: bioLH2ICE	P11: bioLH2FC	P12: bioMeOHICE	P13: bioMeOHFC	P14: bioNH3ICE	P15: bioNH3FC	P16: bioLMGICE	P17: bioLMGFC	P18: blueNH3ICE	P19: blueNH3FC	P20: blueLH2ICE	P21: blueLH2FC	P22: LNGICEOCC	P23: MGOICEOCC	P24: LNGICE	P25: MGOICE
Manufacturing	9.13529e+08	4.81989e+06	7.58123e+06	2.50535e+06	5.83164e+06	1.44683e+07	2.87621e+07	4.25513e+06	7.24453e+06	1.44683e+07	2.87621e+07	2.50535e+06	5.83164e+06	4.81989e+06	7.58123e+06	4.25513e+06	7.24453e+06	4.81989e+06	7.58123e+06	1.44683e+07	2.87621e+07	8.2197e+06	6.78335e+06	4.25513e+06	1.64646e+06
Well-to-tank	55720	8.73227e+07	6.9076e+07	7.68197e+07	6.50949e+07	6.27532e+07	5.58639e+07	8.90714e+07	7.37541e+07	5.04139e+07	4.3797e+07	4.46791e+07	3.5707e+07	5.20567e+07	3.92573e+07	6.23587e+07	5.01433e+07	1.29925e+08	1.05098e+08	4.6911e+07	4.03715e+07	3.12815e+07	1.22761e+08	2.89252e+07	1.06249e+08
Tank-to-wake	0	150257	0	4.09694e+06	0	3.96481e+06	0	4.0464e+06	0	3.96481e+06	0	4.09694e+06	0	150257	0	4.0464e+06	0	150257	0	3.96481e+06	0	5.04416e+06	5.8133e+06	4.0464e+06	4.40932e+06
Replacement	1.82508e+09	146246	1.66964e+06	146246	1.66964e+06	146246	1.2915e+06	146246	1.66964e+06	146246	1.2915e+06	146246	146246	146246	1.66964e+06	146246	1.66964e+06	146246	1.66964e+06	146246	1.2915e+06	146657	146657	146246	146246
Ship structure	3.80954e+07	3.80954e+07	3.80954e+07	3.80954e+07	3.80954e+07	3.80954e+07	3.80954e+07	3.80954e+07	3.80954e+07	3.80954e+07	3.80954e+07	3.80954e+07	3.80954e+07	3.80954e+07	3.80954e+07	3.80954e+07	3.80954e+07	3.80954e+07	3.80954e+07	3.80954e+07	3.80954e+07	3.80954e+07	3.80954e+07	3.80954e+07	3.80954e+07
Total	2.77676e+09	1.30534e+08	1.16422e+08	1.21664e+08	1.10692e+08	1.19428e+08	1.24013e+08	1.35615e+08	1.20764e+08	1.07089e+08	1.11946e+08	8.9523e+07	8.13036e+07	9.52685e+07	8.66036e+07	1.08902e+08	9.71528e+07	1.73137e+08	1.52444e+08	1.03586e+08	1.0852e+08	8.27873e+07	1.736e+08	7.54683e+07	1.50546e+08
Lower limit	3.79458e+08	2.45132e+06	2.39857e+06	2.10526e+06	2.25552e+06	2.0495e+06	2.28425e+06	2.48368e+06	2.45622e+06	1.7178e+06	1.9647e+06	1.24111e+06	1.54358e+06	1.50436e+06	1.66466e+06	1.76547e+06	1.88039e+06	3.5976e+06	3.35004e+06	1.62454e+06	1.87437e+06	966935	3.16815e+06	243020	2.87408e+06
Upper limit	5.20373e+08	2.65828e+06	1.61081e+06	2.28603e+06	1.45081e+06	2.22709e+06	1.77493e+06	2.69459e+06	1.6632e+06	1.86503e+06	1.43414e+06	1.34662e+06	686617	1.63076e+06	820004	1.91332e+06	1.04683e+06	3.90275e+06	2.61903e+06	1.76328e+06	1.33771e+06	1.07024e+06	3.44177e+06	261984	3.12108e+06

## Sheet: EUTF
EUTF	P1: BE	P2: eNH3ICE	P3: eNH3FC	P4: eMeOHICE	P5: eMeOHFC	P6: eLH2ICE	P7: eLH2FC	P8: eLMGICE	P9: eLMGFC	P10: bioLH2ICE	P11: bioLH2FC	P12: bioMeOHICE	P13: bioMeOHFC	P14: bioNH3ICE	P15: bioNH3FC	P16: bioLMGICE	P17: bioLMGFC	P18: blueNH3ICE	P19: blueNH3FC	P20: blueLH2ICE	P21: blueLH2FC	P22: LNGICEOCC	P23: MGOICEOCC	P24: LNGICE	P25: MGOICE
Manufacturing	9761.75	54.5188	77.2637	29.0359	58.0007	160.747	292.287	48.3009	73.5565	160.747	292.287	29.0359	58.0007	54.5188	77.2637	48.3009	73.5565	54.5188	77.2637	160.747	292.287	92.532	76.9346	48.3009	19.5795
Well-to-tank	0.5419	285.606	234.438	238.715	210.645	133.547	122.442	407.027	352.391	690.578	667.17	605.728	546.226	639.646	533.791	896.467	784.997	666.471	556.473	222.47	209.401	310.675	181.923	287.146	157.452
Tank-to-wake	0	0	0	50.9705	0	49.1623	0	49.1623	0	49.1623	0	50.9705	0	0	0	49.1623	0	0	0	49.1623	0	59.639	69.0084	49.1623	54.0938
Replacement	19503.4	1.6115	13.3948	1.6115	13.3948	1.6115	5.14641	1.6115	13.3948	1.6115	5.14641	1.6115	1.6115	1.6115	13.3948	1.6115	13.3948	1.6115	13.3948	1.6115	5.14641	1.61603	1.61603	1.6115	1.6115
Ship structure	601.027	601.027	601.027	601.027	601.027	601.027	601.027	601.027	601.027	601.027	601.027	601.027	601.027	601.027	601.027	601.027	601.027	601.027	601.027	601.027	601.027	601.027	601.027	601.027	601.027
Total	29866.7	942.763	926.124	921.36	883.068	946.095	1020.9	1107.13	1040.37	1503.13	1565.63	1288.37	1218.65	1296.8	1225.48	1596.57	1472.97	1323.63	1248.16	1035.02	1107.86	1065.49	930.509	987.248	833.764
Lower limit	4055.02	8.89422	11.5678	6.95216	10.6099	8.27593	9.55953	12.008	13.9651	22.6426	23.7892	16.8153	18.682	18.4421	18.8408	25.1698	24.7348	19.1669	19.4215	10.2684	11.6105	9.86665	5.98981	1.62755	4.50709
Upper limit	5560.89	9.67068	4.95223	7.53151	3.88985	8.84921	8.14191	13.0121	7.48467	24.6031	23.3805	18.2439	12.5613	19.9757	12.7915	27.2911	18.9805	20.7534	13.4138	11.0399	10.3615	10.9211	6.4921	1.71831	4.88078

## Sheet: EUTM
EUTM	P1: BE	P2: eNH3ICE	P3: eNH3FC	P4: eMeOHICE	P5: eMeOHFC	P6: eLH2ICE	P7: eLH2FC	P8: eLMGICE	P9: eLMGFC	P10: bioLH2ICE	P11: bioLH2FC	P12: bioMeOHICE	P13: bioMeOHFC	P14: bioNH3ICE	P15: bioNH3FC	P16: bioLMGICE	P17: bioLMGFC	P18: blueNH3ICE	P19: blueNH3FC	P20: blueLH2ICE	P21: blueLH2FC	P22: LNGICEOCC	P23: MGOICEOCC	P24: LNGICE	P25: MGOICE
Manufacturing	33580.3	163.474	256.52	88.8291	200.095	474.641	536.655	145.26	245.661	474.641	536.655	88.8291	200.095	163.474	256.52	145.26	245.661	163.474	256.52	474.641	536.655	273.019	226.274	145.26	61.1295
Well-to-tank	190.188	7204.05	5951.46	1768.44	1465.79	1152.08	964.934	2259.63	1851.08	6406.93	6103.72	5611.44	4979.67	10643.3	8859.49	6890.18	5943.93	69482.4	58610	2785.36	2562.14	2513.32	3607	2323.23	3121.82
Tank-to-wake	0	28123	28.2035	28361.3	7.27832	26316.3	0	26303.6	7.27832	26316.3	0	28361.3	7.27832	28123	28.2035	26303.6	7.27832	28123	28.2035	26316.3	0	27375.6	30574.2	26303.6	28382.6
Replacement	67140.2	4.72438	89.8667	4.72438	89.8667	4.72438	16.881	4.72438	89.8667	4.72438	16.881	4.72438	4.72438	4.72438	89.8667	4.72438	89.8667	4.72438	89.8667	4.72438	16.881	4.73767	4.73767	4.72438	4.72438
Ship structure	1283.75	1283.75	1283.75	1283.75	1283.75	1283.75	1283.75	1283.75	1283.75	1283.75	1283.75	1283.75	1283.75	1283.75	1283.75	1283.75	1283.75	1283.75	1283.75	1283.75	1283.75	1283.75	1283.75	1283.75	1283.75
Total	102194	36779	7609.8	31507	3046.78	29231.5	2802.22	29996.9	3477.64	34486.3	7941.01	35350	6560.66	40218.2	10517.8	34627.5	7570.49	99057.3	60268.3	30864.8	4399.43	31450.5	35696	30060.5	32854
Lower limit	13959.3	197.039	187.099	48.8579	73.6179	42.7746	43.1496	63.6215	81.8742	184.353	187.184	152.228	160.021	289.628	265.191	188.113	182.186	1873.37	1599.21	86.6711	87.1454	71.7769	95.147	7.4813	84.5369
Upper limit	19143.3	213.934	146.456	53.0493	24.9733	46.3208	39.6209	68.9694	33.5741	199.632	192.875	165.353	117.511	314.598	228.884	204.316	140.693	2034.23	1640.4	94.2011	86.5251	78.9048	103.033	8.04438	91.7909

## Sheet: EUTT
EUTT	P1: BE	P2: eNH3ICE	P3: eNH3FC	P4: eMeOHICE	P5: eMeOHFC	P6: eLH2ICE	P7: eLH2FC	P8: eLMGICE	P9: eLMGFC	P10: bioLH2ICE	P11: bioLH2FC	P12: bioMeOHICE	P13: bioMeOHFC	P14: bioNH3ICE	P15: bioNH3FC	P16: bioLMGICE	P17: bioLMGFC	P18: blueNH3ICE	P19: blueNH3FC	P20: blueLH2ICE	P21: blueLH2FC	P22: LNGICEOCC	P23: MGOICEOCC	P24: LNGICE	P25: MGOICE
Manufacturing	299417	1739.41	2155.3	942.729	1553.08	5060.46	6000.81	1545.01	2039.41	5060.46	6000.81	942.729	1553.08	1739.41	2155.3	1545.01	2039.41	1739.41	2155.3	5060.46	6000.81	2907.55	2408.4	1545.01	647.093
Well-to-tank	2040.69	377809	317920	16569.6	13495.2	12869.2	10814.6	21943.3	17795	457785	445904	405422	369045	699161	589634	463645	408206	1.10313e+06	931202	30704.6	28256	26952.6	39491.8	24914.2	34179.7
Tank-to-wake	0	321587	308.861	324601	79.706	303022	0	301160	79.706	303022	0	324601	79.706	321587	308.861	301160	79.706	321587	308.861	303022	0	315900	354048	301160	325773
Replacement	598589	50.3568	396.713	50.3568	396.713	50.3568	195.209	50.3568	396.713	50.3568	195.209	50.3568	50.3568	50.3568	396.713	50.3568	396.713	50.3568	396.713	50.3568	195.209	50.4985	50.4985	50.3568	50.3568
Ship structure	12787.1	12787.1	12787.1	12787.1	12787.1	12787.1	12787.1	12787.1	12787.1	12787.1	12787.1	12787.1	12787.1	12787.1	12787.1	12787.1	12787.1	12787.1	12787.1	12787.1	12787.1	12787.1	12787.1	12787.1	12787.1
Total	912833	713973	333568	354950	28311.8	333789	29797.7	337486	33098	778705	464887	743803	383862	1.03532e+06	605282	779188	423509	1.43929e+06	946850	351624	47239.2	358598	408786	340457	373437
Lower limit	124455	10201.5	8654.06	459.537	484.796	471.789	482.155	620.628	594.079	12437.5	12767.7	10924.1	10022	18852.7	15937.5	12507.6	10758.5	29722	25083.8	951.111	962.962	775.202	1044.33	80.8665	925.266
Upper limit	170672	11080.7	8945.3	498.499	299.71	510.858	430.593	672.728	415.845	13510.6	13462.3	11862.5	10387.7	20470.9	16650.3	13583.4	11114.2	32278	26342.3	1033.93	943.15	851.566	1129.37	87.0231	1004.76

## Sheet: HTOXC
HTOXC	P1: BE	P2: eNH3ICE	P3: eNH3FC	P4: eMeOHICE	P5: eMeOHFC	P6: eLH2ICE	P7: eLH2FC	P8: eLMGICE	P9: eLMGFC	P10: bioLH2ICE	P11: bioLH2FC	P12: bioMeOHICE	P13: bioMeOHFC	P14: bioNH3ICE	P15: bioNH3FC	P16: bioLMGICE	P17: bioLMGFC	P18: blueNH3ICE	P19: blueNH3FC	P20: blueLH2ICE	P21: blueLH2FC	P22: LNGICEOCC	P23: MGOICEOCC	P24: LNGICE	P25: MGOICE
Manufacturing	0.225638	0.00344531	0.00380753	0.00173879	0.00251754	0.0105592	0.00993332	0.00302892	0.00355927	0.0105592	0.00993332	0.00173879	0.00251754	0.00344531	0.00380753	0.00302892	0.00355927	0.00344531	0.00380753	0.0105592	0.00993332	0.00586296	0.00475423	0.00302892	0.00110553
Well-to-tank	0.00171619	0.00958425	0.00806178	0.00967754	0.00880327	0.00790354	0.00768036	0.0122667	0.0107984	0.00335079	0.00322816	0.00223281	0.00199612	0.00298466	0.00248159	0.00518422	0.00453828	0.00434125	0.00362863	0.00216557	0.00206912	0.00341751	0.00108461	0.00315858	0.000938719
Tank-to-wake	0	0	0	0.000322462	0	0.000174787	0	0.000174787	0	0.000174787	0	0.000322462	0	0	0	0.000174787	0	0	0	0.000174787	0	0.000323278	0.000374572	0.000174787	0.00019232
Replacement	0.451174	0.000107271	0.000480782	0.000107271	0.000480782	0.000107271	4.77404e-05	0.000107271	0.000480782	0.000107271	4.77404e-05	0.000107271	0.000107271	0.000107271	0.000480782	0.000107271	0.000480782	0.000107271	0.000480782	0.000107271	4.77404e-05	0.000107573	0.000107573	0.000107271	0.000107271
Ship structure	0.0119055	0.0119055	0.0119055	0.0119055	0.0119055	0.0119055	0.0119055	0.0119055	0.0119055	0.0119055	0.0119055	0.0119055	0.0119055	0.0119055	0.0119055	0.0119055	0.0119055	0.0119055	0.0119055	0.0119055	0.0119055	0.0119055	0.0119055	0.0119055	0.0119055
Total	0.690434	0.0250423	0.0242556	0.0237516	0.0237071	0.0306503	0.0295669	0.0274832	0.0267439	0.0260975	0.0251147	0.0163068	0.0168999	0.0184427	0.0186754	0.0204007	0.0204838	0.0197993	0.0198224	0.0249123	0.0239557	0.0216168	0.0182265	0.0183751	0.0142493
Lower limit	0.0938051	0.000339954	0.000448531	0.000295879	0.000431401	0.000533325	0.000563924	0.000400303	0.000496325	0.00044527	0.000467273	9.68794e-05	0.000302366	0.000172442	0.000337777	0.000210781	0.000366137	0.000202944	0.000357298	0.000425344	0.000444555	0.000251901	0.000165704	0.000101325	4.49813e-05
Upper limit	0.12864	0.000368469	0.000198107	0.000321757	0.000178737	0.000568578	0.00058769	0.000434985	0.000249038	0.000472572	0.00048383	0.000104183	4.14482e-05	0.000184494	7.91446e-05	0.000227869	0.000108364	0.000218192	0.000100507	0.000448964	0.000458217	0.000271358	0.000174268	0.000106436	4.83609e-05

## Sheet: HTOXNC
HTOXNC	P1: BE	P2: eNH3ICE	P3: eNH3FC	P4: eMeOHICE	P5: eMeOHFC	P6: eLH2ICE	P7: eLH2FC	P8: eLMGICE	P9: eLMGFC	P10: bioLH2ICE	P11: bioLH2FC	P12: bioMeOHICE	P13: bioMeOHFC	P14: bioNH3ICE	P15: bioNH3FC	P16: bioLMGICE	P17: bioLMGFC	P18: blueNH3ICE	P19: blueNH3FC	P20: blueLH2ICE	P21: blueLH2FC	P22: LNGICEOCC	P23: MGOICEOCC	P24: LNGICE	P25: MGOICE
Manufacturing	1.57279	0.00516405	0.00681945	0.00327336	0.00539025	0.0130456	0.0351227	0.00470272	0.0065444	0.0130456	0.0351227	0.00327336	0.00539025	0.00516405	0.00681945	0.00470272	0.0065444	0.00516405	0.00681945	0.0130456	0.0351227	0.00910143	0.00830711	0.00470272	0.00257176
Well-to-tank	0.0279886	0.139985	0.117234	0.135699	0.122857	0.109302	0.105582	0.142488	0.124762	0.0449768	0.0426781	0.0305348	0.0266992	0.0476033	0.0391216	0.0466986	0.040096	0.0850785	0.0708082	0.0342153	0.0321542	0.0210604	0.0291186	0.0194675	0.0252019
Tank-to-wake	0	9.00656e-05	0	0.003563	0	0.00345277	0	0.0046147	0	0.00345277	0	0.003563	0	9.00656e-05	0	0.0046147	0	9.00656e-05	0	0.00345277	0	0.00515047	0.00530011	0.0046147	0.00451338
Replacement	3.14256	0.000119677	0.00112234	0.000119677	0.00112234	0.000119677	0.000380692	0.000119677	0.00112234	0.000119677	0.000380692	0.000119677	0.000119677	0.000119677	0.00112234	0.000119677	0.00112234	0.000119677	0.00112234	0.000119677	0.000380692	0.000120014	0.000120014	0.000119677	0.000119677
Ship structure	0.0379251	0.0379251	0.0379251	0.0379251	0.0379251	0.0379251	0.0379251	0.0379251	0.0379251	0.0379251	0.0379251	0.0379251	0.0379251	0.0379251	0.0379251	0.0379251	0.0379251	0.0379251	0.0379251	0.0379251	0.0379251	0.0379251	0.0379251	0.0379251	0.0379251
Total	4.78127	0.183284	0.1631	0.18058	0.167295	0.163845	0.179011	0.18985	0.170354	0.09952	0.116107	0.0754159	0.0711368	0.0909022	0.0849884	0.0940607	0.0856878	0.128377	0.116675	0.0887584	0.105583	0.0733574	0.080771	0.0668296	0.0703317
Lower limit	0.65338	0.0038542	0.00345949	0.00368696	0.00357476	0.00324452	0.00331084	0.00390876	0.00355755	0.00151164	0.00152831	0.000859189	0.00102949	0.00137108	0.00137677	0.00133438	0.00136263	0.00237768	0.00221562	0.0012229	0.00124254	0.000680789	0.000829708	0.000132543	0.00069638
Upper limit	0.896018	0.00418418	0.00314781	0.00400478	0.00327308	0.00351864	0.0034644	0.00424236	0.00323985	0.00164019	0.0015757	0.000931375	0.000568263	0.00148524	0.000944632	0.00144479	0.000926502	0.00257898	0.00183203	0.00132547	0.00127012	0.000753491	0.000899682	0.000141114	0.00075573

[truncated: 8 more sheets: IR, LU, OD, PM, PCOF, RUF, RUMM, WU]
