# Supplementary material for: Role of biofuels, electro-fuels, and blue fuels for shipping: environmental and economic life cycle considerations
Source: Royal Society of Chemistry journal article supplement (doi:10.1039/d4ee01641f), 2024-01-01
Supplement: d4ee01641f2.pdf [file d4ee01641f2.pdf]

## Supplementary information

# Role of biofuels, electro-fuels, and blue fuels for shipping: Environmental and economic life cycle considerations.

Fayas Malik Kanchiralla<sup>1\*</sup>, Selma Brynolf<sup>1</sup>, Alvar Mjelde<sup>2</sup>,

<sup>1</sup>Chalmers University of Technology, Department of Mechanics and Maritime Sciences, Maritime Environmental Sciences, SE-412 96, Gothenburg, Sweden

<sup>2</sup>DNV AS, Veritasveien 1, Høvik, Norway

\*corresponding author: [fayas.kanchiralla@chalmers.se](mailto:fayas.kanchiralla@chalmers.se) ; +46 31 7721439

This supplementary information covers details on the method, materials, case study vessels, technical descriptions of technologies, life cycle inventory data, and other detailed results from life cycle assessment.

A combined assessment of environmental and economic performance from a life cycle perspective is performed in the study. As explained in the main article an integrated life cycle framework adopted from study [1] is used. The pLCA used in this study is used to assess emerging technologies when the knowledge is sparse [2] and considers the environmental performance at a time in the future when the technology is likely to get developed. Similarly, LCC is a tool for assessing the economic dimension of sustainability and is capable of supporting decision-making at different stages of the life cycle, and also aligned with the LCA study with a life cycle thinking [1]. For the LCC and pLCA evaluation to be conducted without inconsistencies during the inventory assessment phase, it is crucial to consistently choose parameters for each technology/process, such as efficiency, energy use, and material consumption. The problem with using common inventories is that the flow parameters differ for cost and environmental impact assessments. To accomplish this, all parameters are calculated using Python codes written to perform cost calculation and integrate impact assessment calculation in openLCA.

|                                                                                   |
|-----------------------------------------------------------------------------------|
| <b>Climate change</b><br>kg CO <sub>2</sub> eq   IPCC AR6-2021                    |
| <b>Photochemical ozone formation</b><br>kg NMVOC eq   ReCiPe2008                  |
| <b>Human Toxicity (non-cancer)</b><br>CTUh   USEtox® 2.1                          |
| <b>Human Toxicity (cancer)</b><br>CTUh   USEtox® 2.1                              |
| <b>Particulate matter</b><br>disease inc.   Fantke et al. (2016) in UNEP (2016)   |
| <b>Ionizing radiation</b><br>kBq U-235 eq   Frischknecht et al 2000               |
| <b>Ozone depletion</b><br>kg CFC11 eq   WMO, 2014 + integrations                  |
| <b>Eutrophication freshwater</b><br>kg P eq   ReCiPe2008                          |
| <b>Acidification</b><br>mol H+ eq   Seppälä et al 2006, Posch et al 2008          |
| <b>Eutrophication marine</b><br>kg N eq   ReCiPe2008                              |
| <b>Ecotoxicity freshwater</b><br>CTUe   USEtox® 2.1                               |
| <b>Eutrophication terrestrial</b><br>mol N   Seppälä et al 2006, Posch et al 2008 |
| <b>Land use</b><br>Pt   LANCA model                                               |
| <b>Water use</b><br>m <sup>3</sup> depriv.   AWARE, 2016                          |
| <b>Resource use: fossils</b><br>MJ   CML method v. 4.8 (2016)                     |
| <b>Resource use: metals and minerals</b><br>kg Sb eq   CML method v. 4.8 (2016)   |
| <b>Midpoints</b>                                                                  |

Figure S 1: The midpoint indicators used in this study for impact assessment.

The midpoint level is used for the impact assessment and the sixth assessment report of the Intergovernmental Panel on Climate Change (IPCC) is used for calculating GWP100 [3] and other impact

categories are assessed based on LCIA methods according to Environmental Footprint (EF) 3.0 recommended by the European Commission’s Joint Research Centre [4] as shown in Figure 8.

## S1 Method

### S1.1 Size calculation

The propulsion system for each vessel is calculated based on the present installed capacity of the ships. Based on the present installed capacity the power required from the energy efficiency of components in the current installation. The components vary on the type of technical system considered in the study, termed configuration in the main article. Figure S2 shows the sizing of the component for different configurations.

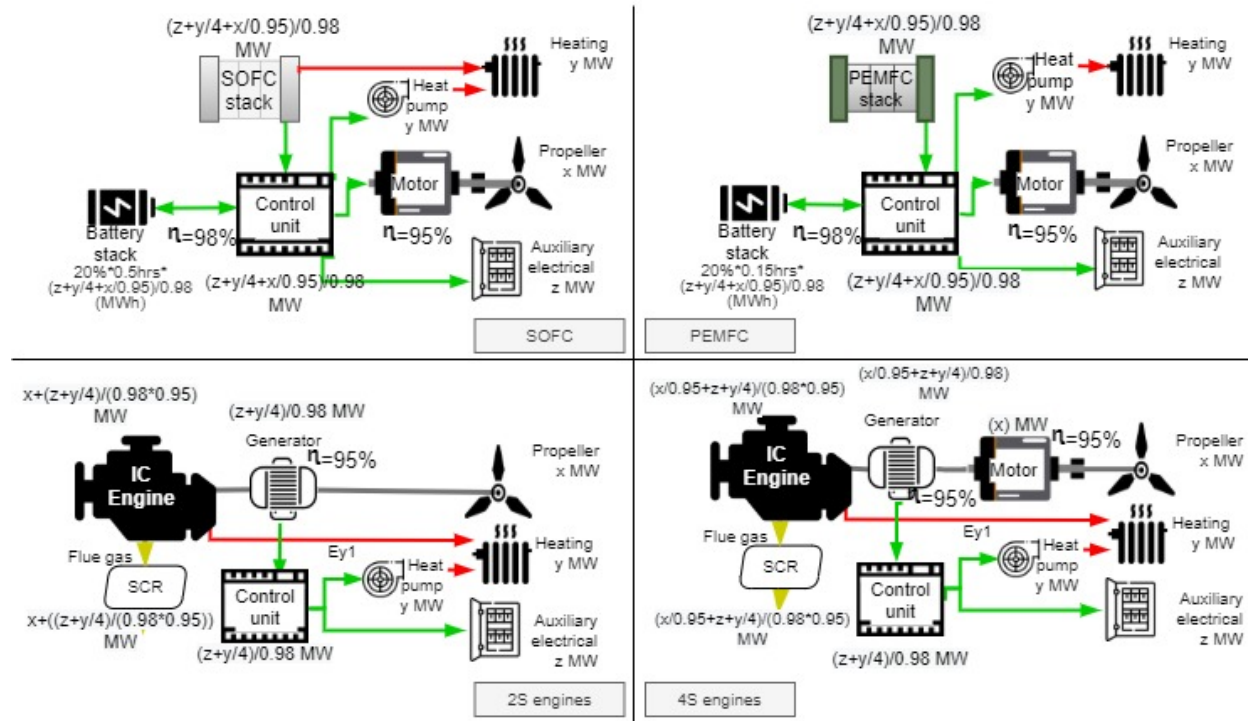

Figure S 2: The calculations for the sizing of the component for different configurations.

### S1.2 Fuel production cost.

The cost of e-fuels, biofuels, and blue fuels ( $CF_{LC}$ ) is calculated by dividing it into capex cost, fixed OPEX cost, and variable OPEX. The capex cost (annualized capital cost) is calculated by converting the total investment to net present value using the capital recovery factor (crf) mentioned in the main article section 2.2.4. The investment costs for different processes in the fuel production pathways are taken from the literature review and the assumed costs are given in Table 4 of the main article. The higher and lower limits of the investment cost considered in the uncertainty analysis are given in Table S 6. The maximum fuel production capacity for all fuels assumed is 10000GJ/day and the investment cost is calculated towards these fuel production capacities using specific investment costs mentioned in Table 4 to get the total investment cost. The CAPEX is calculated for each of the production pathways separately. The same method is used for calculating the CAPEX for DAC and ASU, however the production capacity assumed is 50t/day. CAPEX varies usually with the economy of scale, however that is not considered. The fixed OPEX is calculated from the investment cost as these are yearly costs and are assumed to be directly related to the investment cost. These are also listed in Table 4. The variable operation cost is associated with the

costs linked to the feedstock price e.g. energy, material, consumables, etc... which varies with the production output and also the process efficiencies.

### S1.3 Replacements

The number of replacements is determined by comparing the life time of components and ships ( $N_{repl,i}$ ). The degradation of FCs is approximated at 0.4 percent per 1000 hours of operation, with the FC being deemed replaceable at the point of capacity loss of 20 percent. In uncertainty analysis, a higher degradation of 0.6 percent per 1000 hours of operation is considered. For battery replacement, a simplified assumption of ten years with a 60% depth of charge (DOC) as numerous factors influencing battery life (e.g., usage duration, charging cycles, and battery charging technology) are unknown and will only become apparent during the detailed design phase. SCR life is considered as 15 years as a simplified assumption for replacement.

### S1.4 Normalization and weighting

The environmental impact results in the article are converted to a single score based on the normalization factors and weighing factors in Table S1. The global normalization factors (NFs) are taken from EF 3.0 [5]. Global NFs represent the relevance of the total environmental impact in a certain category in a global context [5]. The weighting factors are taken from the weighing approach suggested in EF 3.0 [6].

*Table S 1: Normalization factors and weighing factors used in the study.*

|                                 | Normalization<br>Factors [5] | Weighing<br>Factors [6] |
|---------------------------------|------------------------------|-------------------------|
| Acidification                   | 5.56E+01                     | 6.2                     |
| Ecotoxicity, freshwater         | 4.27E+04                     | 1.92                    |
| Eutrophication, freshwater      | 1.61E+00                     | 2.8                     |
| Eutrophication, marine          | 1.95E+01                     | 2.96                    |
| Eutrophication, terrestrial     | 1.77E+02                     | 3.71                    |
| Human toxicity, cancer          | 1.69E-05                     | 2.13                    |
| Human toxicity, non-cancer      | 2.30E-04                     | 1.84                    |
| Ionizing radiation              | 4.22E+03                     | 5.01                    |
| Land use                        | 8.20E+05                     | 7.94                    |
| Ozone depletion                 | 5.36E-02                     | 6.31                    |
| Particulate matter              | 5.95E-04                     | 8.96                    |
| Photochemical ozone formation   | 4.06E+01                     | 4.78                    |
| Resource use, fossils           | 6.50E+04                     | 8.32                    |
| Resource use, minerals & metals | 6.37E-02                     | 7.55                    |
| Water use                       | 1.15E+04                     | 8.51                    |
| IPCC 2021 GWP 100               | 8.10E+03                     | 21.06                   |

### S1.5 IAM prospective scenarios

SSP scenarios are developed by IAM community to structure the uncertainty around socio-economic developments such as national GDP, education and demographics. In this study SSP2 ‘Middle-of-the-Road’ socio-economic pathway is considered, and this pathway describes development in line with historically observed. Table S2 summarize the IAM prospective scenarios considered in the study and is adopted from [7, 8]

Table S 2: IAM prospective scenarios considered in the study [7, 8].

| SSP/RC P scenario | GMST increase by 2100 | Society/economic trend                      | Climate policy                              | Model name             |
|-------------------|-----------------------|---------------------------------------------|---------------------------------------------|------------------------|
| SSP2-None         | ~2.5 °C               | Extrapolation from historical developments. | Nationally Determined Contributions (NDCs). | REMIND SSP2-NDC        |
| SSP2-RCP2.6       | 1.6-1.8 °C            | Extrapolation from historical developments. | Paris Agreement objective.                  | REMIND SSP2-PkBudg1150 |
| SSP2-RCP1.9       | 1.2-1.4 °C            | Extrapolation from historical developments. | Paris Agreement objective.                  | REMIND SSP2-PkBudg500  |

## S2 Technological system description

### S2.1 Fuel production

All e-fuel production pathways except for e-methane are based on our previous studies [9, 10].

*E-methane* can be produced from electricity from renewable, e-hydrogen, and captured CO<sub>2</sub> [11]. The study assumes that methane is produced by the Sabatier reaction process, which requires 2.939 kg of carbon dioxide, 0.506 kg of hydrogen, and 0.33 kWh of electricity and heat [11]. Hydrogen is assumed to come from electrolysis and CO<sub>2</sub> is assumed from DAC as modeled in our previous studies [9, 10]. Liquefaction of methane is assumed to require 0.292 kWh of electricity per kg of methane [12]. The infrastructure for the e-methane synthesis is adopted from [13] and for liquefaction is from Ecoinvent 3.8.

*Liquid blue-hydrogen* is generated through the process of methane reforming of natural gas, along with CO<sub>2</sub> capture and storage. Methane reforming of natural gas can be achieved through either steam methane reforming or auto-thermal reforming. Simulation results from the study [14] show that auto-thermal reforming can attain high CO<sub>2</sub> capture rates, hence auto thermal reforming is considered. Amine-based absorption is being considered for CO<sub>2</sub> capture technology with a 90% capture rate. The inventory data for blue hydrogen is sourced from the LCA study [14]. The data for natural gas is taken from Ecoinvent 3.8 (market group for natural gas, high pressure | natural gas, high pressure). 1.5% methane leakage is considered in the supply chain for natural gas till the production plant. The captured CO<sub>2</sub> is transported from the facilities to the port, then transferred by tanker to an injection site located 1000 km away from the port, where it is injected into geological storage. Inventory data for CO<sub>2</sub> transport and injection is extracted from the study [15]. The infrastructure for the blue hydrogen is considered from [14] and from Ecoinvent 3.8. The hydrogen liquefaction is modeled as in previous studies [9, 10].

*Blue-ammonia* is produced from the reforming of methane from natural gas and combined with CO<sub>2</sub> capture and storage similar to blue hydrogen. However, additional energy is required for the Haber Bosch process, and operation of ASU is assumed from renewable electricity. Parameters for auto-thermal reforming, CO<sub>2</sub> capture technology, CO<sub>2</sub> transport, and storage are assumed similar to the blue hydrogen production mentioned above. The infrastructure for the blue ammonia production plant is adopted from the study [16].

*Bio-methanol* is assumed to be produced from biomass using biomass gasification technology where biomass is converted to syngas and is taken from the study [17] and summary is shown in Figure 3. Residual biomass from the sustainably managed forest is assumed as feedstock for gasification where the inventory data is taken from Ecoinvent. Dried biomass is subjected to gasification with steam in a high-pressure

gasifier. Heat pipes transfer the heat from the combustor to the gasifier to facilitate the endothermic steam gasification reactions. Char, a byproduct of the gasification process, is burned along with extra wood in the combustion chamber using air. The syngas produced is nearly nitrogen-free due to the separation of the two chambers. It is assumed that for processing 1 kg dry biomass 0.5 kg water, 0.33kg Olivine (bed material), 0.002 kg ammonia, and 0.0008 kg sulphur are required [18, 19]. The raw syngas is treated using acid gas removal and waste gas shift and are sent to the methanol synthesis plant for production of the methanol. It is assumed that except for the carbon that flows into the methanol, all remaining carbon in the biomass is emitted as CO<sub>2</sub>. The overall efficiency of the process is assumed 60% and total biomass needed is 1.79 kg per tonne of biomethanol.

*Liquid bio-methane* is also produced similarly to bio-methanol except that the treated syngas is sent to methanation for the production of methane gas. Similar to bio-methanol it is assumed that the remaining carbon in the biomass other than that flows into methane is emitted as CO<sub>2</sub>. The overall efficiency of the process is assumed 60% and total biomass needed is 4.50 kg per tonne of biomethane. bio-methane is then upgraded and liquefied (same process as mentioned in e-methane) to produce liquid biomethane.

*Liquid bio-hydrogen* is also produced using similar process as shown in Figure S3. However, syngas is treated differently at acid gas removal and waste gas shift where the H<sub>2</sub> concentration in treated syngas is maximised during syngas treatment. Afterwards, the treated syngas containing raw H<sub>2</sub> is purified and separated in pressure swing adsorption to obtain hydrogen with a purity of >99.97% [17]. The tail gas from pressure swing adsorption is combusted with air in the gasification combustion chamber to recover energy. The carbon in the biomass is assumed to be emitted as CO<sub>2</sub> into atmosphere. The overall efficiency of the process is assumed 55% and total biomass needed is 11.79 kg per tonne of biohydrogen. The hydrogen is then liquified similar to the liquid e-hydrogen which is mentioned in previous studies [9, 10].

*Bio-ammonia* is assumed to be produced from bio-hydrogen and nitrogen using Haber Bosch process as shown in Figure x. The electricity required for Haber Bosch process and ASU is assumed similar to the e-ammonia pathway with only difference that hydrogen comes from biomass gasification route. The infrastructure for Haber Bosch and the ASU is also same from previous study[9, 10].

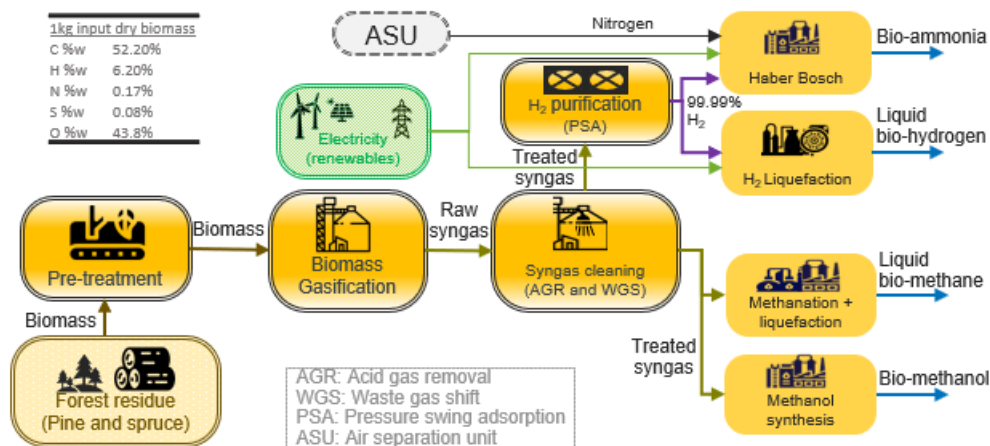

Figure S 3: Biofuel production pathway considered in the study.

### S2.3 Power train system

Engine and SCR: Engine configuration depends on the type of ship and also on the fuel type. Vessel operating long distance are often 2 stroke engine with slow speed, 4S engines with medium speed engines,

and diesel electric which is usually 4S engines with generator and electric motors. The material data for the engine, selective catalytic reduction, batteries, electric motor, PEMFC, SOFC are assumed same as in our previous study [9, 10]. MeOHICE is a propulsion option fueled by methanol in a dual-fuel engine and the pilot fuel is MGO. To meet the Tier III requirement, 2 stroke engine requires SCR as NO<sub>x</sub> abatement technology. 4S engine have lesser NO<sub>x</sub> emissions than 4S engine but still requires SCR for NO<sub>x</sub> abatement system however need lesser urea. The NH<sub>3</sub>ICE and H<sub>2</sub> ICE are also dual fuel engine which also includes gas injection system, and the pilot fuel is MGO. The emissions are assumed based on stoichiometric efficiencies, percentage of pilot fuel, and also comparing to gas engine parameters. The exhaust of NH<sub>3</sub> ICEs contains unburned NH<sub>3</sub> and NO<sub>x</sub> emissions because of fuel-bound nitrogen [32, 33]. The SCR system can convert NO<sub>x</sub> emissions by utilizing NH<sub>3</sub> in the exhaust. Experts recommend that fine-tuning the engine to optimize NH<sub>3</sub> combustion can effectively reduce NO<sub>x</sub> in SCR and meet tier III standards. It is assumed that the NH<sub>3</sub> and NO<sub>x</sub> emissions post-SCR would be comparable to emissions from existing SCR systems. An uncertainty analysis is conducted in this study to assess the impact of nitrous oxide emissions on GWP. For methane and LNG, low pressure dual fuel (LPDF) engine is considered technology for 4S engine, SCR is not required for this type of engine. However, for 2S LNG/methane engine SCR is considered for meeting tier III requirement. Methane slip is main concern for methane/LNG engine and uncertainty analysis is conducted in this study to assess the impact of methane slip on GWP.

### S3 Ship details

Table S 3: Statistics of the ship used in the study

| Row Labels                       |                                              | Bulk carriers    | Container ships  | Cruise ships   |
|----------------------------------|----------------------------------------------|------------------|------------------|----------------|
|                                  |                                              | 25000 - 49999 GT | 50000 - 99999 GT | ≥ 100000 GT    |
| Average statistics               | No of IMO's                                  | 6,434            | 1,049            | 103            |
|                                  | Avg ME kw Installed                          | 8,990            | 52,650           | 67,300         |
|                                  | Avg design speed (Knop)                      | 14.2             | 24.1             | 21.1           |
|                                  | Avg DWT                                      | 65,500           | 85,670           |                |
|                                  | Avg gross tonnes                             | 36,740           | 75,790           | 143,550        |
| Average time in each mode        | Maneuvering                                  | 5.8 %            | 8.4 %            | 6.3 %          |
|                                  | Harbour                                      | 44.5 %           | 30.5 %           | 35.2 %         |
|                                  | At sea                                       | 49.7 %           | 61.1 %           | 58.5 %         |
| Total Operations                 | Sum of Distance (NM)                         | 562,833,937,000  | 158,802,147,000  | 15,210,943,000 |
|                                  | Sum of AIS Hours                             | 52,236,000       | 8,779,000        | 877,000        |
| FUEL totals per consumer (tonne) | Sum of (Total Fuel Consumption (MetricTon))  | 28,107,100       | 20,158,000       | 3,737,300      |
|                                  | Sum of (ME Fuel Consumption (MetricTon))     | 23,994,900       | 16,182,800       | 2,940,900      |
|                                  | Sum of (AE Fuel Consumption (MetricTon))     | 3,339,100        | 3,562,300        | 702,300        |
|                                  | Sum of (Boiler Fuel Consumption (MetricTon)) | 773,100          | 412,900          | 94,200         |
| Fuel totals per mode (tonne)     | At sea (ME+AE)                               | 24,845,100       | 17,417,000       | 3,281,200      |
|                                  | Harbour (AE+B)                               | 2,598,800        | 1,800,000        | 348,900        |
|                                  | Maneuvering (ME+AE+B)                        | 663,200          | 941,000          | 107,200        |

### S4 Summary of Technological Readiness Level

Summary of technology readiness level (TRL) of different technologies are given in Figure S4. It is crucial to acknowledge that technologies are currently at different stages of readiness, and the advancement in technological development is influenced by investment choices. In the assessment, it is assumed that all technologies will have reached maturity by 2035. This assumption is crucial in conducting a prospective life cycle assessment, as it allows for a comprehensive understanding of the impact of each technology when fully developed. This understanding is essential in making informed decisions regarding investment.

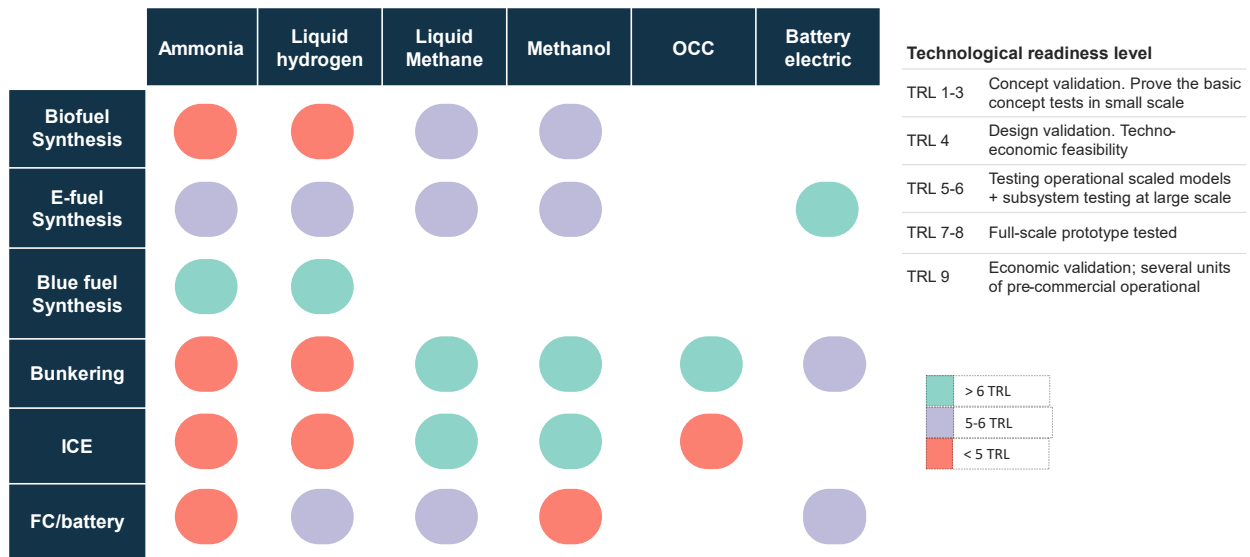

Figure S 4: Technological readiness level of different pathways

## S5 Uncertainty analysis

As the evaluated technologies are immature, performance parameters may undergo different changes as they mature. We ran a Monte Carlo simulation uncertainty analysis to see how results would change if the parameters were changed compared to the base assumptions could have affected the outcomes. A developing scenario method is used (Figure S2) where ranges of parameters in different development pathways are considered. In the article, the lower range is named the pessimistic scenario, and the high range is the optimistic scenario. For base value, the parameter in between is considered. The values for these parameters are considered from the literature review. Tables S3 to S6 show ranges of the values for different key parameters considered in the study. Apart from the parameters listed in the Tables, emissions from the ammonia and LNG/LMG engine operation are also varied as given below.

- Ammonia engines: Nitrous oxide emission range min 0.03 max 0.2g/kWh
- LNG/LMG 2S engines cruising: Methane emission range min 0.1; max 0.5g/kWh
- LNG/LMG 2S engines maneuvering: Methane emission range min 1; max 10g/kWh
- LNG/LMG 4S engines cruising: Methane emission range min 2; max 6g/kWh
- LNG/LMG 4S engines maneuvering: Methane emission range min 10; max 25g/kWh

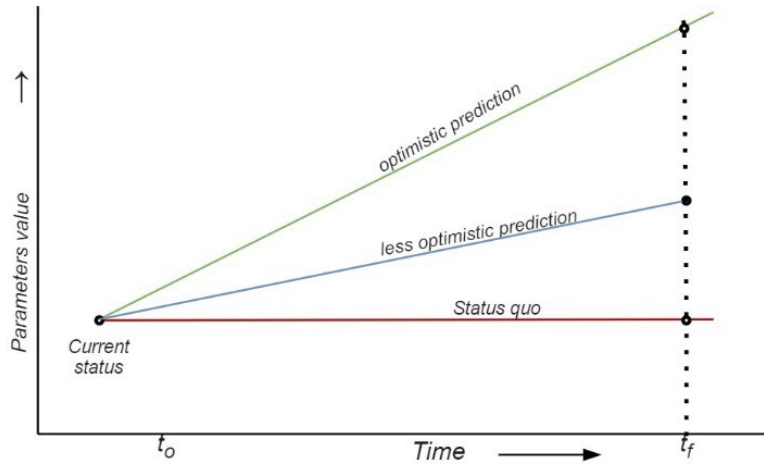

Figure S 5: Different development pathways possible for emerging technologies [1]

Table S 4: Ship parameters considered in uncertainty analysis.

| <b>Parameter</b>   | <b>unit</b>      | <b>Base value</b> | <b>Pessimistic value</b> | <b>Optimistic value</b> | <b>Ref</b> |
|--------------------|------------------|-------------------|--------------------------|-------------------------|------------|
| 2SICE_eff_cru      |                  | 0.48              | 0.46                     | 0.5                     | [9, 20]□   |
| 2SICE_NH3_eff_cru  |                  | 0.46              | 0.44                     | 0.48                    | [9, 20]□   |
| 4SICE_eff_cru      |                  | 0.46              | 0.44                     | 0.48                    | [9, 20]□   |
| 4SICE_NH3_eff_cru  |                  | 0.44              | 0.42                     | 0.46                    | [9, 20]□   |
| 2SICE_eff_man      |                  | 0.42              | 0.4                      | 0.44                    | [9, 20]□   |
| 2SICE_NH3_eff_man  |                  | 0.4               | 0.38                     | 0.42                    | [9, 20]□   |
| 4SICE_eff_man      |                  | 0.4               | 0.38                     | 0.42                    | [9, 20]□   |
| 4SICE_NH3_eff_man  |                  | 0.38              | 0.36                     | 0.4                     | [9, 20]□   |
| OCC_el_MGO_2S      | kWh/kWhoutengine | 0.059             | 0.06                     | 0.058                   | [21-24]□   |
| OCC_el_LNG_2S      | kWh/kWhoutengine | 0.03              | 0.031                    | 0.029                   | [21-24]□   |
| OCC_el_MGO_4S      | kWh/kWhoutengine | 0.062             | 0.064                    | 0.06                    | [21-24]□   |
| OCC_el_LNG_4S      | kWh/kWhoutengine | 0.029             | 0.03                     | 0.028                   | [21-24]□   |
| OCC_th_MGO_2S      | kWh/kWhoutengine | 0.19              | 0.18                     | 0.2                     | [21-24]□   |
| OCC_th_LNG_2S      | kWh/kWhoutengine | 0.11              | 0.1                      | 0.12                    | [21-24]□   |
| OCC_th_MGO_4S      | kWh/kWhoutengine | 0.15              | 0.14                     | 0.16                    | [21-24]□   |
| OCC_th_LNG_4S      | kWh/kWhoutengine | 0.06              | 0.06                     | 0.07                    | [21-24]□   |
| PEMFC_eff          |                  | 0.55              | 0.53                     | 0.57                    | [9, 10]    |
| SOFC_NH3_eff       |                  | 0.58              | 0.56                     | 0.6                     | [9, 10]    |
| SOFC_CH4_eff       |                  | 0.6               | 0.58                     | 0.62                    | [25]□      |
| SOFC_MeOH_eff      |                  | 0.58              | 0.56                     | 0.6                     | [9, 10]    |
| 2SMGO_CCS_capacity | kgCO2/h/kW       | 0.57              | 0.59                     | 0.55                    | *          |
| 2SLNG_CCS_capacity | kgCO2/h/kW       | 0.44              | 0.46                     | 0.42                    | *          |
| 4SMGO_CCS_capacity | kgCO2/h/kW       | 0.59              | 0.61                     | 0.57                    | *          |
| 4SLNG_CCS_capacity | kgCO2/h/kW       | 0.44              | 0.46                     | 0.42                    | *          |

\*Own calculations, □adapted

Table S 5: Costs associated with component and fuel distribution considered in uncertainty analysis

| <b>Parameter</b>  | <b>unit</b> | <b>Base value</b> | <b>Pessimistic value</b> | <b>Optimistic value</b> | <b>Ref</b> |
|-------------------|-------------|-------------------|--------------------------|-------------------------|------------|
| Battery cost      | €/kWh       | 200               | 500                      | 150                     | [9]        |
| OCC cost          | €/kgCO2/h   | 2000              | 1600                     | 3500                    | [21, 22]   |
| ICE opex cost     | % annual    | 0.02              | 0.02                     | 0.02                    | [9]        |
| NH3 distribution  | €/GJ        | 1.20              | 1.20                     | 1.20                    | [26]       |
| MeOH distribution | €/GJ        | 0.60              | 0.60                     | 0.60                    | [26]       |
| LH2 distribution  | €/GJ        | 14.00             | 14.00                    | 14.00                   | [26]       |
| LNG distribution  | €/GJ        | 4.69              | 4.69                     | 4.69                    | [26]       |
| MGO distribution  | €/GJ        | 0.20              | 0.20                     | 0.20                    | [26]       |
| Elec_distribution | €/GJ        | 10.20             | 10.20                    | 10.20                   | [27]       |



Table S 6: Parameters of fuel production pathways used in uncertainty analysis.

| <b>Parameter</b>                                    | <b>unit</b>   | <b>Base value</b> | <b>Pessimistic value</b> | <b>Optimistic value</b> | <b>Ref</b>   |
|-----------------------------------------------------|---------------|-------------------|--------------------------|-------------------------|--------------|
| Electricity: DAC                                    | kWh/kgCO2     | 0.875             | 1.23                     | 0.6                     | [28, 29]     |
| Electricity: Alkaline electrolysis                  | kWh/kg fuel   | 50                | 53                       | 47                      | [30, 31]     |
| KOH consumption: AEC                                | g/kgfuel      | 1.25              | 2                        | 1                       | [30]         |
| Water consumption: Electrolysis                     | kg/kgfuel     | 10                | 10                       | 9                       | [10]         |
| Electricity: H2 liquefaction                        | kWh/kg fuel   | 7                 | 8                        | 6.5                     | [32]         |
| Electricity: NH3 synthesis                          | kWh/kg fuel   | 0.472             | 0.874                    | 0.333                   | [31, 33, 34] |
| Electricity: eMeOH synthesis                        | kWh/kg fuel   | 0.858             | 1.292                    | 0.437                   | [31, 35, 36] |
| Electricity: eMG synthesis                          | kWh/kg fuel   | 0.440             | 0.960                    | 0.330                   | [11, 37]     |
| Electricity: BioH2 synthesis                        | kWh/kg fuel   | 2.2401            | 2.4643                   | 2.0539                  | [17, 38-40]  |
| Biomass: BioH2 synthesis                            | kg/kg fuel    | 11.79             | 12.97                    | 10.81                   | [17, 38-40]  |
| Water consumption: BioH2 synthesis                  | kg/kgfuel     | 5.895             | 6.485                    | 5.405                   | [17, 38-40]  |
| Electricity: BioMeOH synthesis                      | kWh/kg fuel   | 0.3401            | 0.3724                   | 0.3135                  | [18, 19, 41] |
| Biomass: BioMeOH synthesis                          | kg/kg fuel    | 1.79              | 1.96                     | 1.65                    | [18, 19, 41] |
| Water consumption: BioMeOH synthesis                | kg/kgfuel     | 0.895             | 0.98                     | 0.825                   | [18, 19, 41] |
| Electricity: BioLMG synthesis                       | kWh/kg fuel   | 0.856             | 0.934                    | 0.790                   | [18, 42]     |
| Biomass: BioLMG synthesis                           | kg/kg fuel    | 4.505             | 4.914                    | 4.158                   | [18, 42]     |
| Electricity: upgrading and liquefaction Methane     | kWh/kg fuel   | 0.478             | 0.515                    | 0.440                   | [12, 40]     |
| Water consumption: BioLMG                           | kg/kgfuel     | 2.252             | 2.457                    | 2.079                   | [18, 42]     |
| Electricity: BlueNH3                                | kWh/kg fuel   | 0.957             | 1.3                      | 0.957                   | [16, 34, 43] |
| Natural gas: BlueNH3                                | MMBTU/kg fuel | 0.0278731         | 0.044776119              | 0.027873134             | [16, 34, 43] |
| Electricity: BlueH2                                 | kWh/kg fuel   | -0.4164           | -0.4164                  | -0.4164                 | [14, 17]     |
| Natural gas: BlueH2                                 | MMBTU/kg fuel | 0.1462836         | 0.146283582              | 0.146283582             | [14, 17]     |
| Water consumption: BlueNH3                          | kg/kgfuel     | 4.10421           | 4.10421                  | 4.10421                 | [16, 34, 43] |
| MEA consumption: BlueNH3                            | kg/kgfuel     | 0.01755           | 0.01755                  | 0.01755                 | [16, 34, 43] |
| Activated carbon: BlueNH3                           | kg/kgfuel     | 0.08775           | 0.08775                  | 0.08775                 | [16, 34, 43] |
| CO <sub>2</sub> transportation and storage: BlueNH3 | kg/kgfuel     | 1.17              | 1.17                     | 1.17                    | [16, 34, 43] |
| Water consumption: BlueH2                           | kg/kgfuel     | 7.536             | 7.536                    | 7.536                   | [14, 17]     |
| CO <sub>2</sub> transportation and storage: BlueH2  | kg/kgfuel     | 6.1536            | 6.1536                   | 6.1536                  | [14, 17]     |

Table S 7: Cost parameters of the fuel production considered in the uncertainty analysis

| <b>Parameter</b>                                       | <b>unit</b>   | <b>Base value</b> | <b>Pessimistic value</b> | <b>Optimistic value</b> | <b>Ref</b>       |
|--------------------------------------------------------|---------------|-------------------|--------------------------|-------------------------|------------------|
| Interest rate                                          | %             | 0.05              | 0.10                     | 0.03                    | *                |
| Electricity cost                                       | €/MWh         | 50                | 70                       | 30                      | *                |
| Natural gas cost                                       | €/MMBTU       | 8                 | 12                       | 4                       | *                |
| Biomass cost                                           | €/tdrybio     | 130               | 200                      | 50                      | *                |
| MGO price                                              | €/tMGO        | 600               | 800                      | 500                     | *                |
| Capacity factor                                        | %             | 0.90              | 0.85                     | 0.95                    | *                |
| Technical life time                                    | years         | 30                | 25                       | 40                      | *                |
| CO2 transportation and storage                         | €/tCO2        | 20                | 25                       | 10                      | [44]             |
| ASU Plant investment cost                              | k€/(tN2/day)  | 87.58             | 87.58                    | 87.58                   | [34]             |
| ASU Fixed O&M cost                                     | % CAPEX       | 0.05              | 0.05                     | 0.05                    | [34]             |
| DAC Plant investment cost                              | k€/(tCO2/day) | 270               | 300                      | 200                     | [29, 45]         |
| DAC Fixed O&M cost                                     | % CAPEX       | 0.05              | 0.05                     | 0.05                    | [29]             |
| Technical life time Alkaline                           | years         | 25                | 20                       | 30                      | [10]             |
| Electrolysis Plant investment cost                     | €/kWel        | 460               | 570                      | 350                     | [10]             |
| Electrolysis Fixed O&M cost                            | % CAPEX       | 0.05              | 0.05                     | 0.05                    | [10]             |
| LH2 Plant investment cost                              | €/tLH2/day    | 2100000           | 2250000                  | 2100000                 | [32, 46]         |
| LH2 Fixed plant O&M cost                               | % CAPEX       | 0.04              | 0.04                     | 0.04                    | [46]             |
| NH3 N2 consumption                                     | kg/kgfuel     | 0.823             | 0.823                    | 0.823                   | *                |
| NH3 Plant investment cost                              | €/tfuelpd     | 174000            | 215000                   | 160000                  | [31, 33, 34]     |
| NH3 Fixed O&M cost                                     | % CAPEX       | 0.05              | 0.05                     | 0.05                    | [9]              |
| eMeOH Plant investment cost                            | €/tfuelpd     | 69100             | 138200                   | 46100                   | [31, 35, 36]     |
| eMeOH Fixed O&M cost                                   | % CAPEX       | 0.05              | 0.05                     | 0.05                    | [9]              |
| eMG plant investment cost                              | €/tfuelpd     | 145000            | 260000                   | 75000                   | [11, 37]         |
| Methane liquefaction investment cost                   | €/tfuelpd     | 64000             | 66000                    | 60000                   | [37]             |
| eLMG Fixed O&M cost                                    | % CAPEX       | 0.05              | 0.05                     | 0.05                    | [37]             |
| BioH2 plant investment cost                            | €/tfuelpd     | 2777000           | 3194000                  | 2500000                 | [20, 37, 47]     |
| BioH2 Fixed O&M cost                                   | % CAPEX       | 0.05              | 0.05                     | 0.05                    | [20, 37, 47]     |
| BioMeOH gasification & synthesis plant investment cost | €/tfuelpd     | 529000            | 900000                   | 414000                  | [18, 19, 41]     |
| BioMeOH Fixed O&M cost                                 | % CAPEX       | 0.05              | 0.05                     | 0.05                    | [18, 19, 37, 41] |
| BioMG gasification and synthesis plant investment cost | €/tfuelpd     | 1157000           | 1331000                  | 1041000                 | [18, 37, 42]     |
| BioLMG Fixed O&M cost                                  | % CAPEX       | 0.05              | 0.05                     | 0.05                    | [37]             |
| LNG price                                              | €/tLNG        | 500               | 800                      | 400                     | *                |

|                               |           |        |        |        |              |
|-------------------------------|-----------|--------|--------|--------|--------------|
| BlueH2 Plant investment cost  | €/tfuelpd | 250000 | 400000 | 230000 | [44, 48]     |
| BlueH2 Fixed O&M cost         | % CAPEX   | 0.05   | 0.05   | 0.05   | [44, 48]     |
| BlueNH3 Plant investment cost | €/tfuelpd | 325000 | 325000 | 325000 | [16, 34, 43] |
| BlueNH3 Fixed O&M cost        | % CAPEX   | 0.04   | 0.04   | 0.04   | [16, 34, 43] |

\*Own assumptions/calculations based on market

Weight of the components used to calculate the capacity loss is shown in Table S8.

Table S 8: The specific weight and volume of components used for the calculation of the weight and volume of power train components including fuel storage.

|                        | m3/kW       | kg/kW             |
|------------------------|-------------|-------------------|
| Engine                 | 0.0229      | 13                |
| PEMFC                  | 0.0067      | 3.75              |
| SOFC                   | 0.15        | 30                |
| Alternator (kW)        | 0.005       | 2.5               |
| Electric motor (kW)    | 0.005       | 2.5               |
| Heat pump (kW)         | 0.0657072   | 2.5               |
| Gear box (kW)          | 0.00125     | 0.8               |
| Battery (kWh)          | 0.002       | 5                 |
| LNG OCC (KW)           | 0.0374      | 14.96             |
| MGO OCC (KW)           | 0.04845     | 19.38             |
|                        |             |                   |
|                        | m3/GJ       | kg/GJ (with fuel) |
| NH3 (liquid) tank      | 0.096083631 | 68.64173726       |
| CH2 (700 bar) tank     | 0.417899486 | 190.5723906       |
| LH2 tank               | 0.158730159 | 64.20634921       |
| LMG tank               | 0.061387354 | 34.42602824       |
| MeOH tank              | 0.069513958 | 57.54292295       |
| MGO tank               | 0.02        | 27.25788027       |
| LNG tank               | 0.061387354 | 35.25936157       |
| CO2 tank* (/tonne CO2) | 1.1         | 1290              |

## S5 Results

### S5.1 Environmental impacts

The LCA results for impact categories other than GWP are shown in figures S5 to S19 for bulk carrier. All results including life cycle cost, life cycle impacts for all categories for all assessed ship types are attached in supplementary excel files.

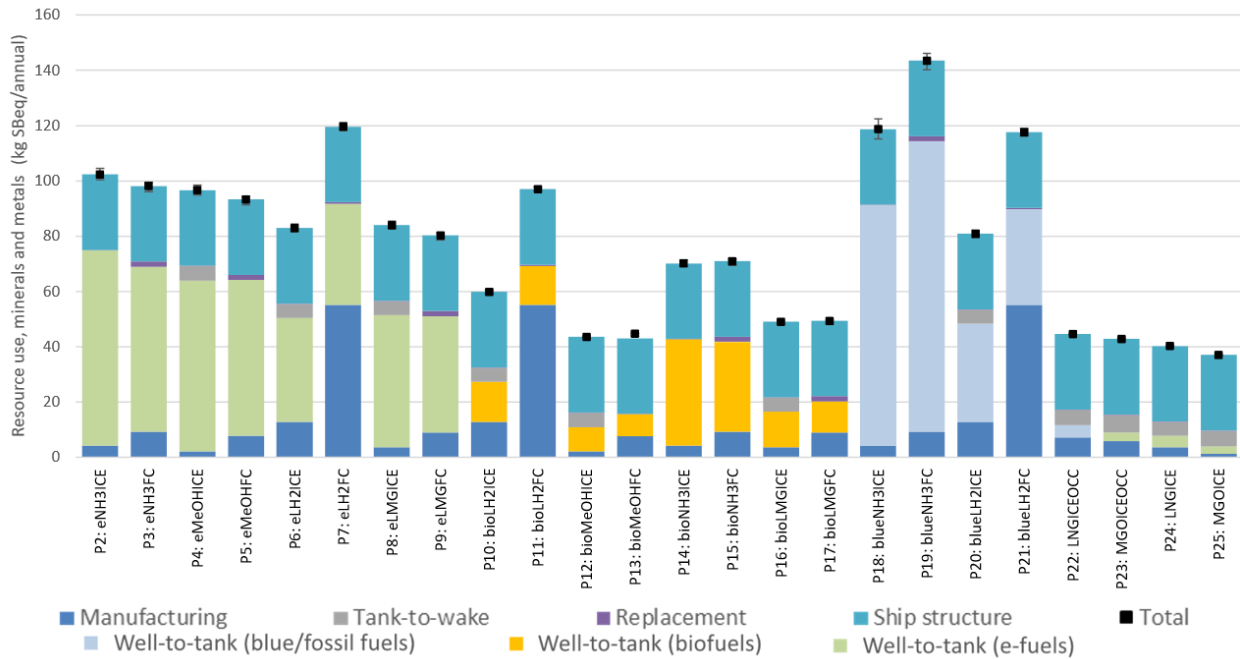

Figure S 6: LCA result on impact category resource use, minerals and metals

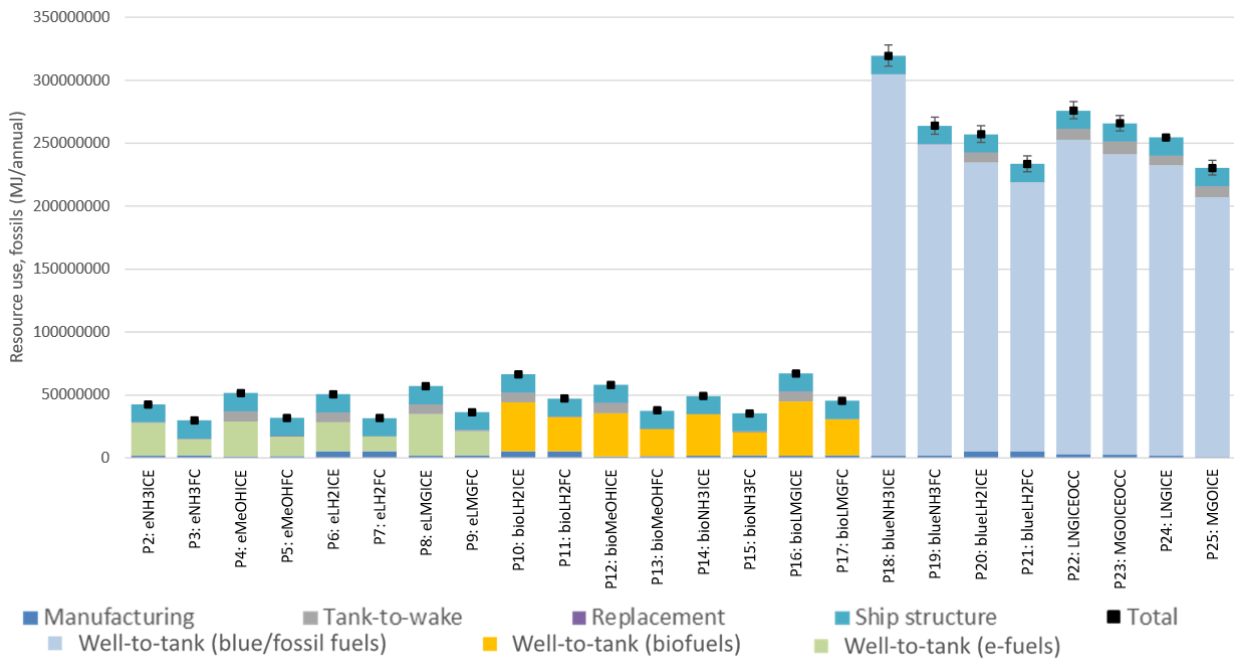

Figure S 7: LCA result on impact category resource use, fossils

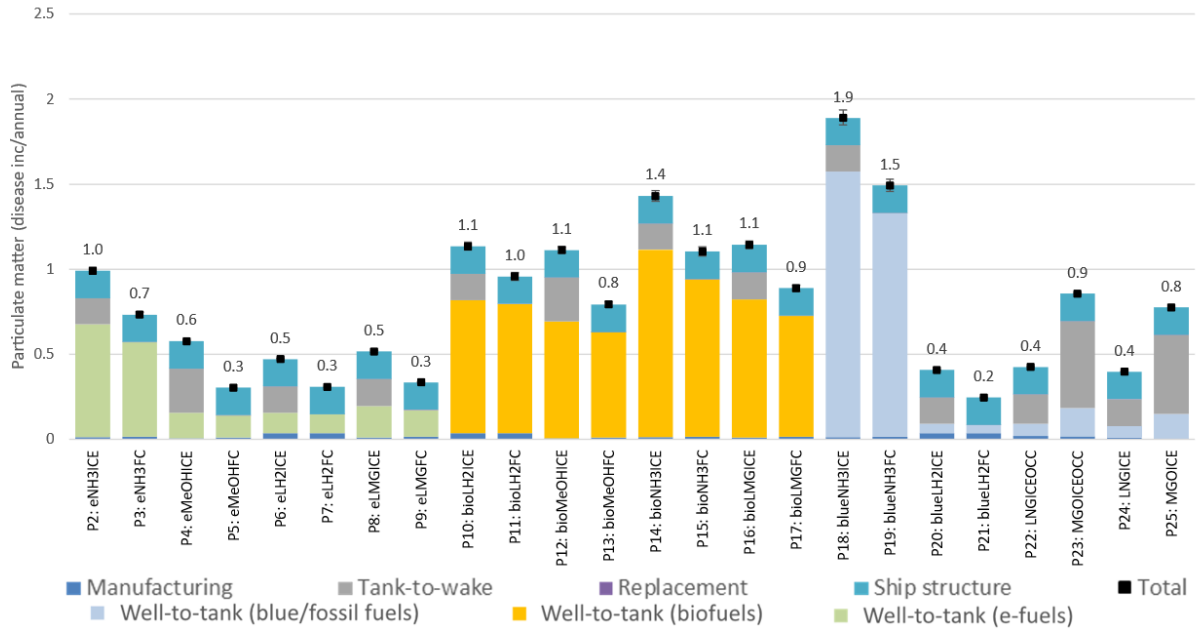

Figure S 8: LCA result on impact category Particulate matter

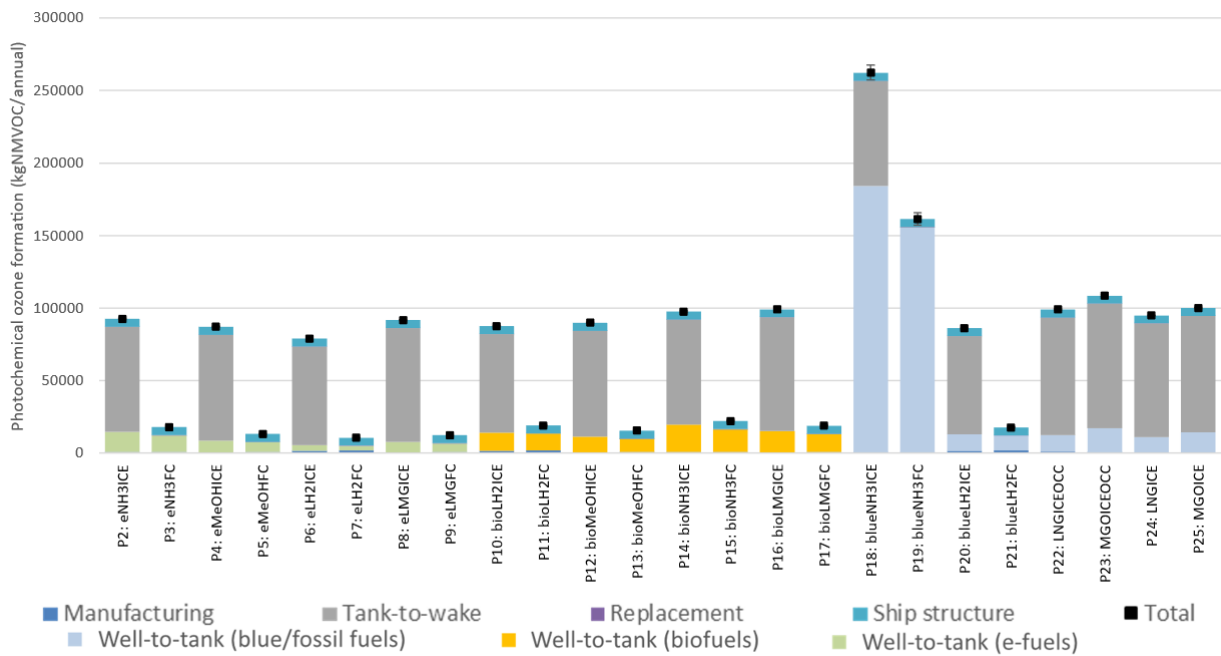

Figure S 9: LCA result on impact category- Photochemical ozone formation

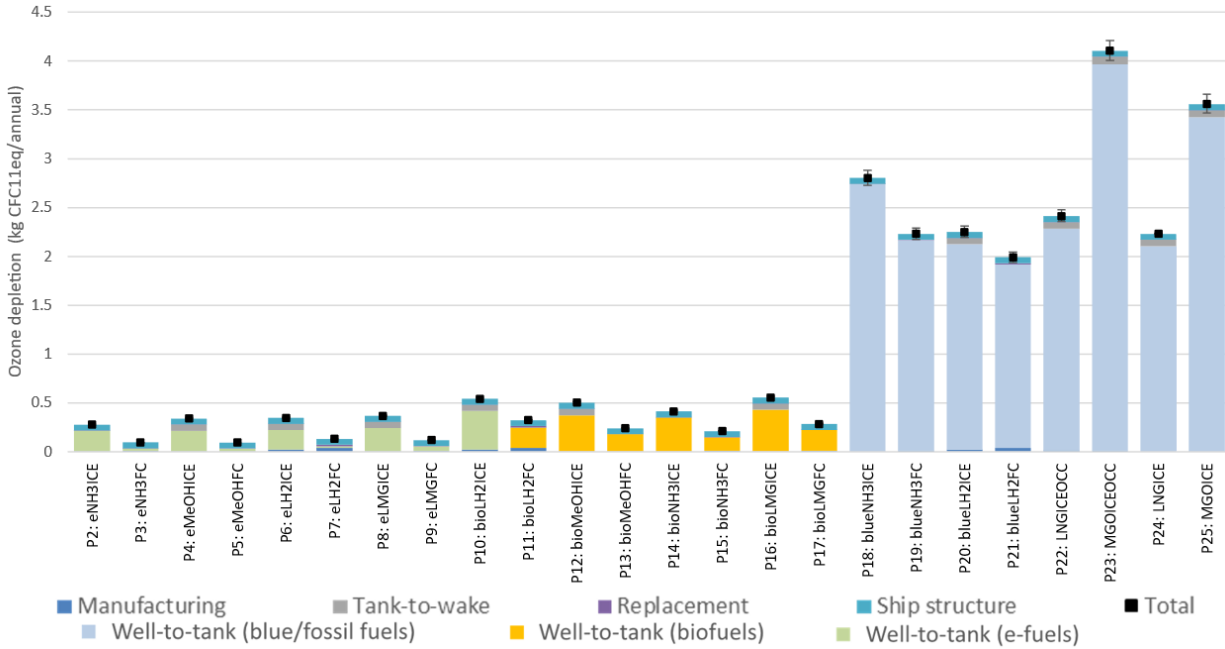

Figure S 10: LCA result on impact category-Ozone depletion

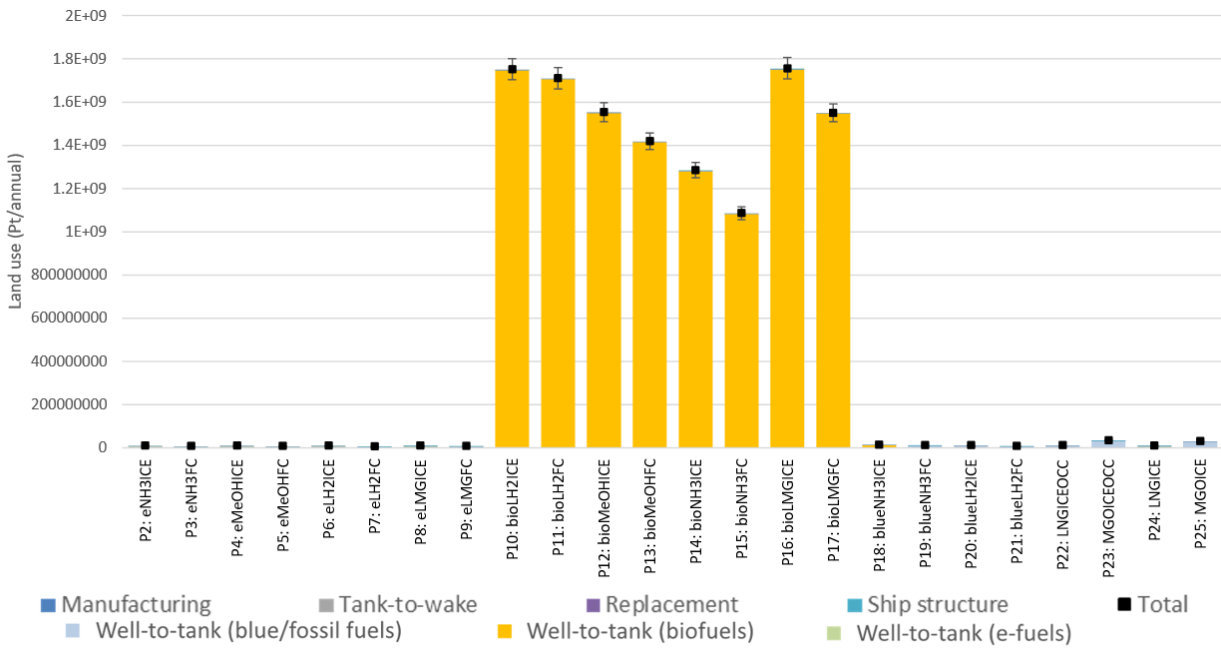

Figure S 11: LCA result on impact category-Land use

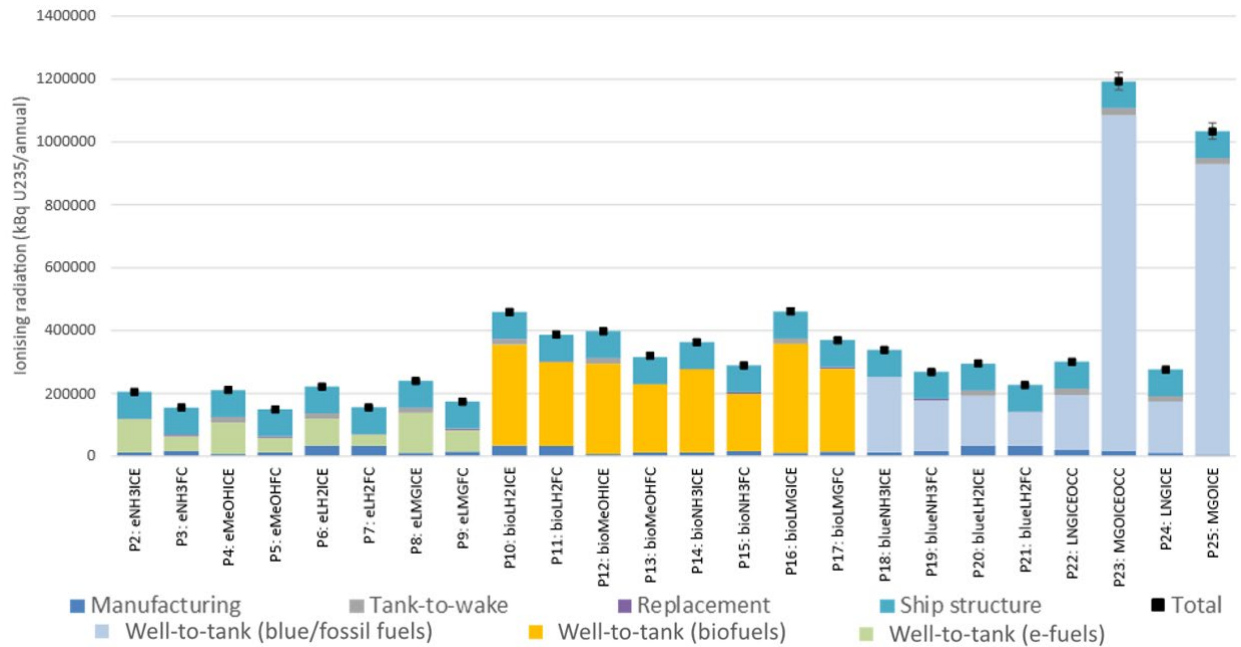

Figure S 12: LCA result on impact category-ionising radiation

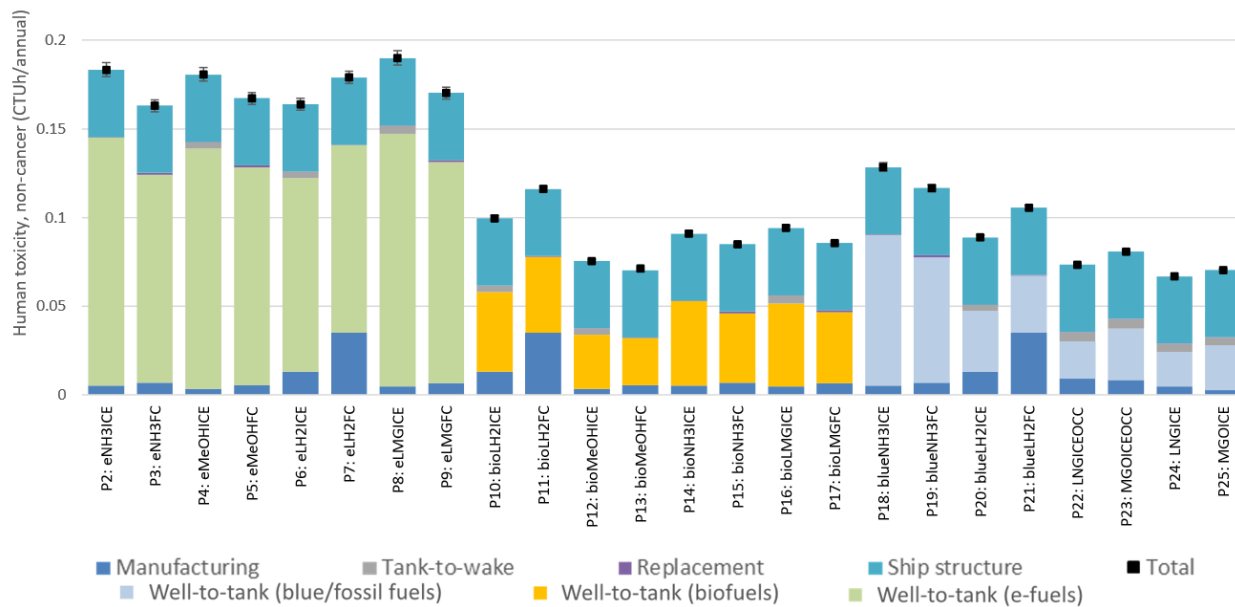

Figure S 13: LCA result on impact category-Human toxicity, non cancer

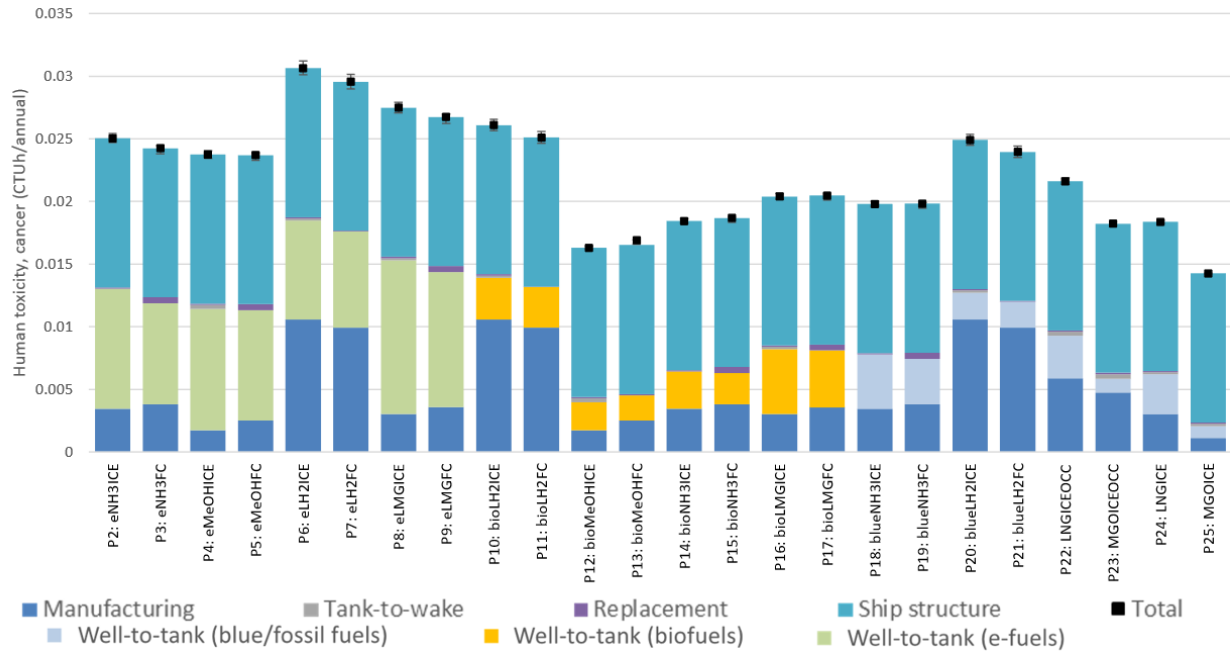

Figure S 14: LCA result on impact category-Human toxicity cancer

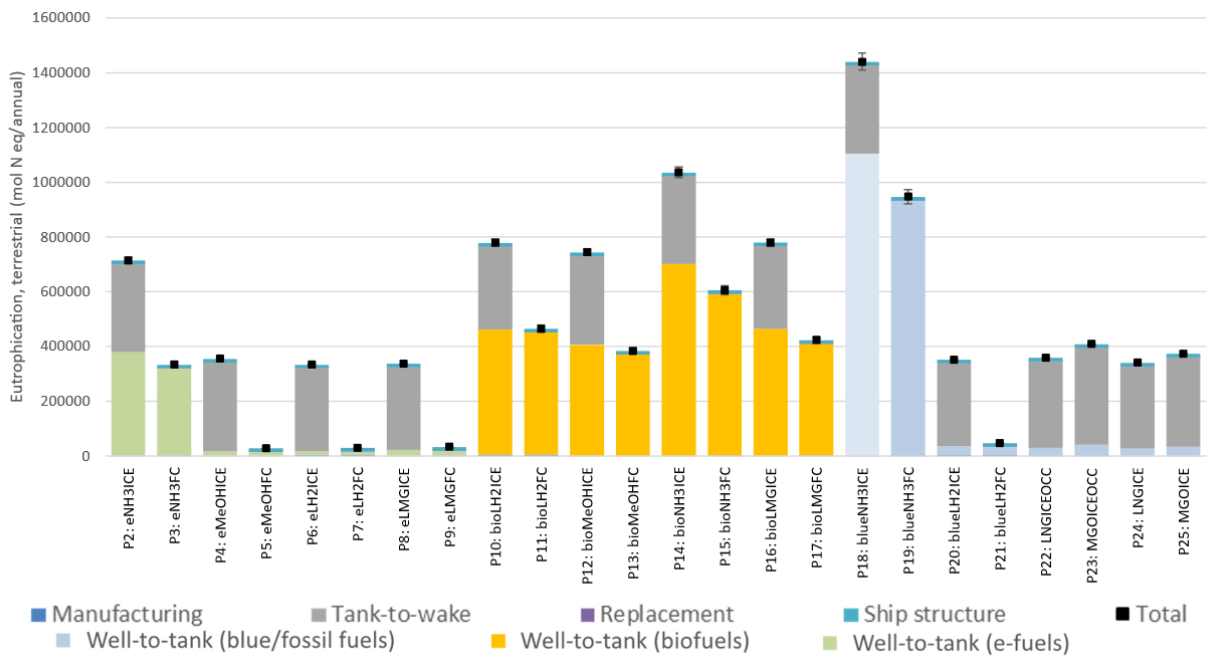

Figure S 15: LCA result on impact category- Eutrophication, terrestrial

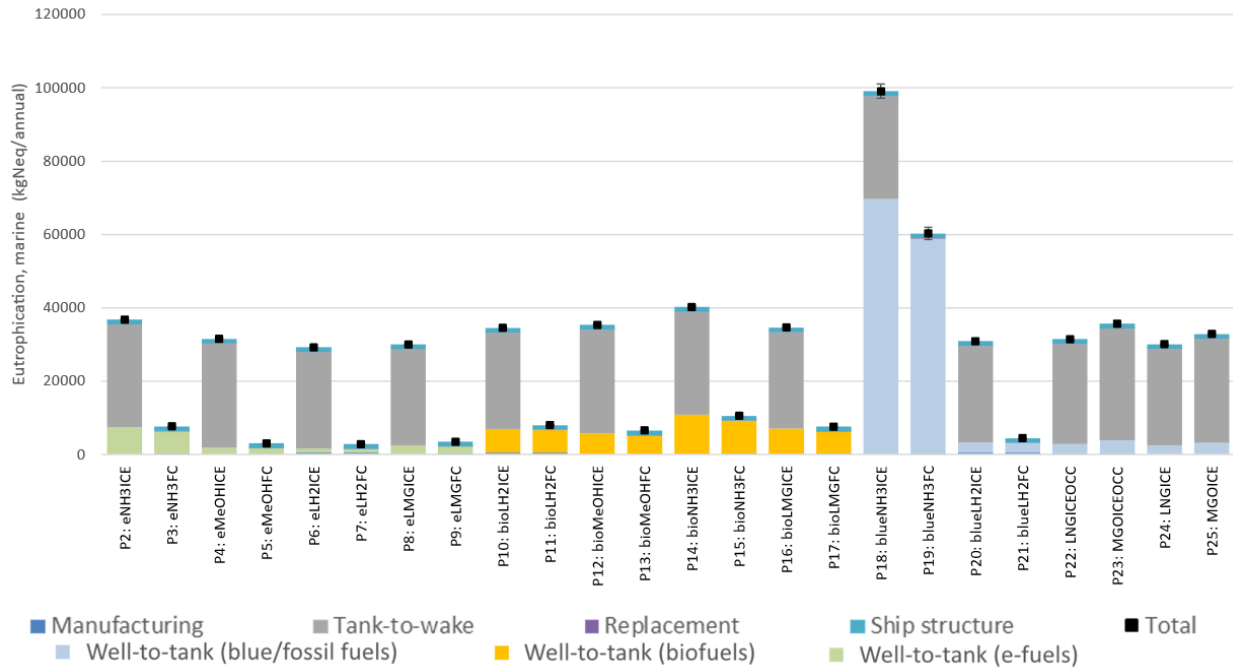

Figure S 16: LCA result on impact category-marine eutrophication

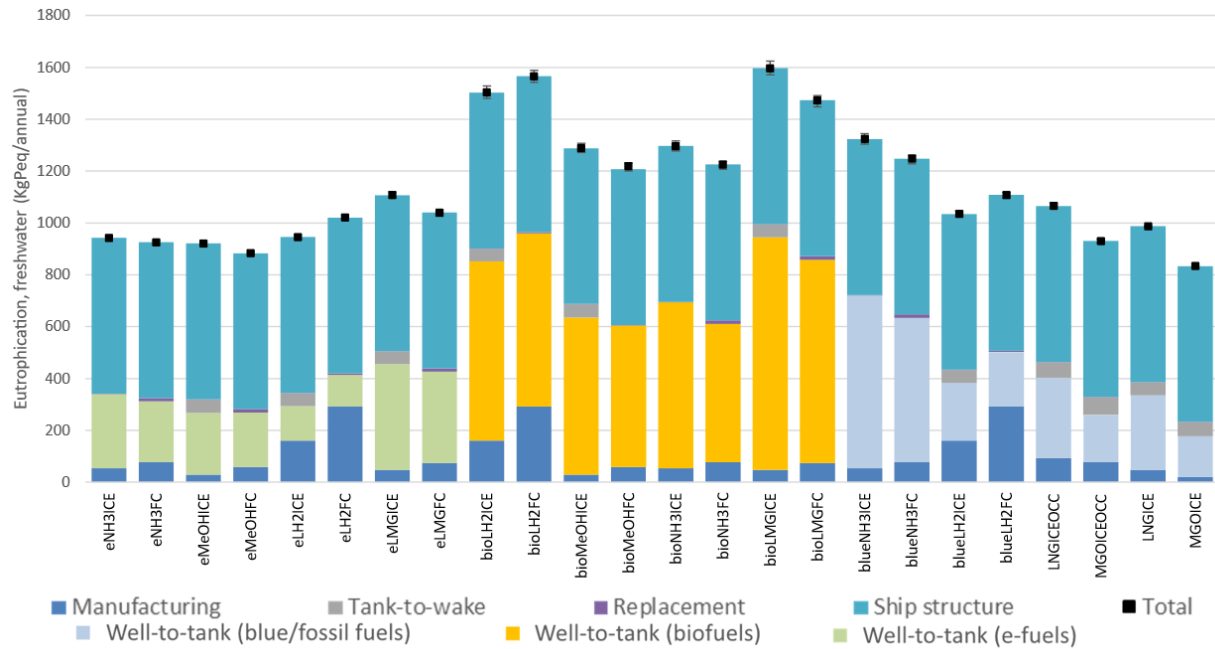

Figure S 17: LCA result on impact category-Freshwater eutrophication



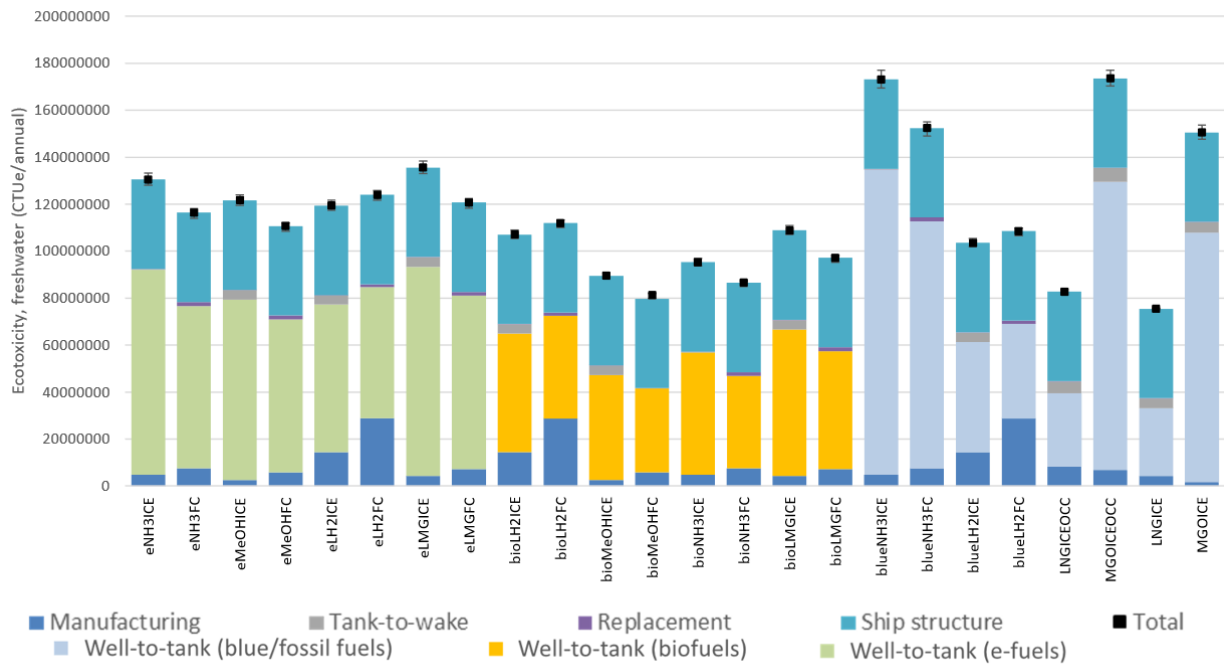

Figure S 18: LCA result on impact category- Ecotoxicity freshwater

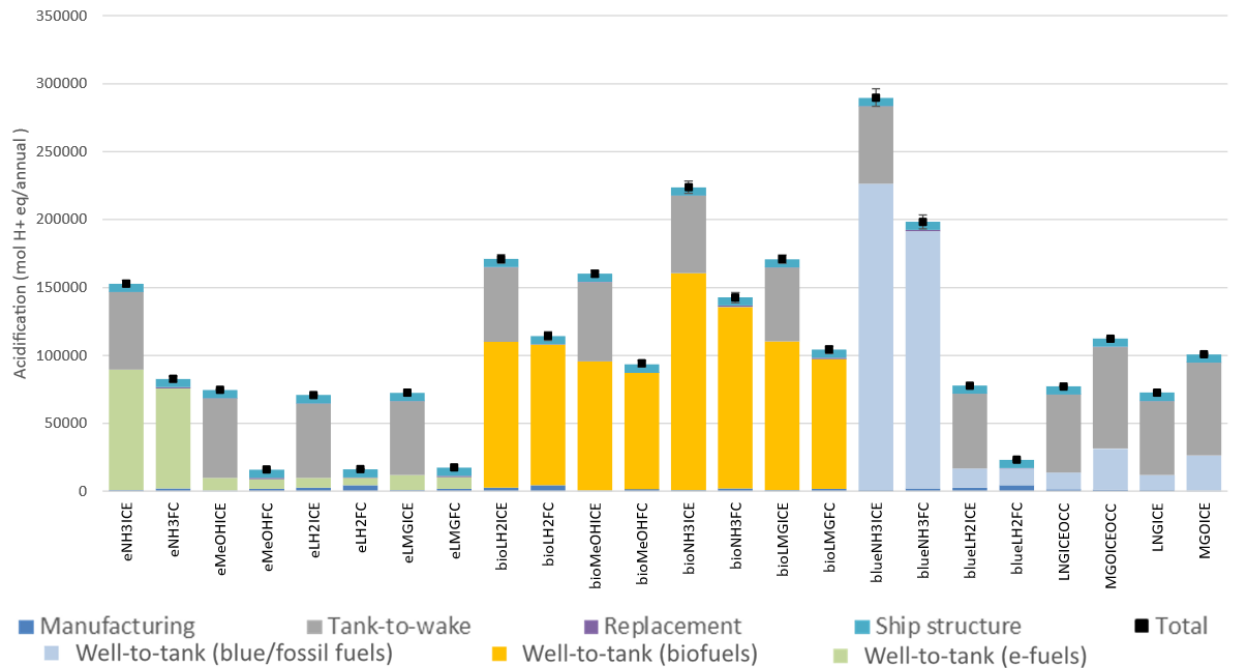

Figure S 19: LCA result on impact category- Acidification potential

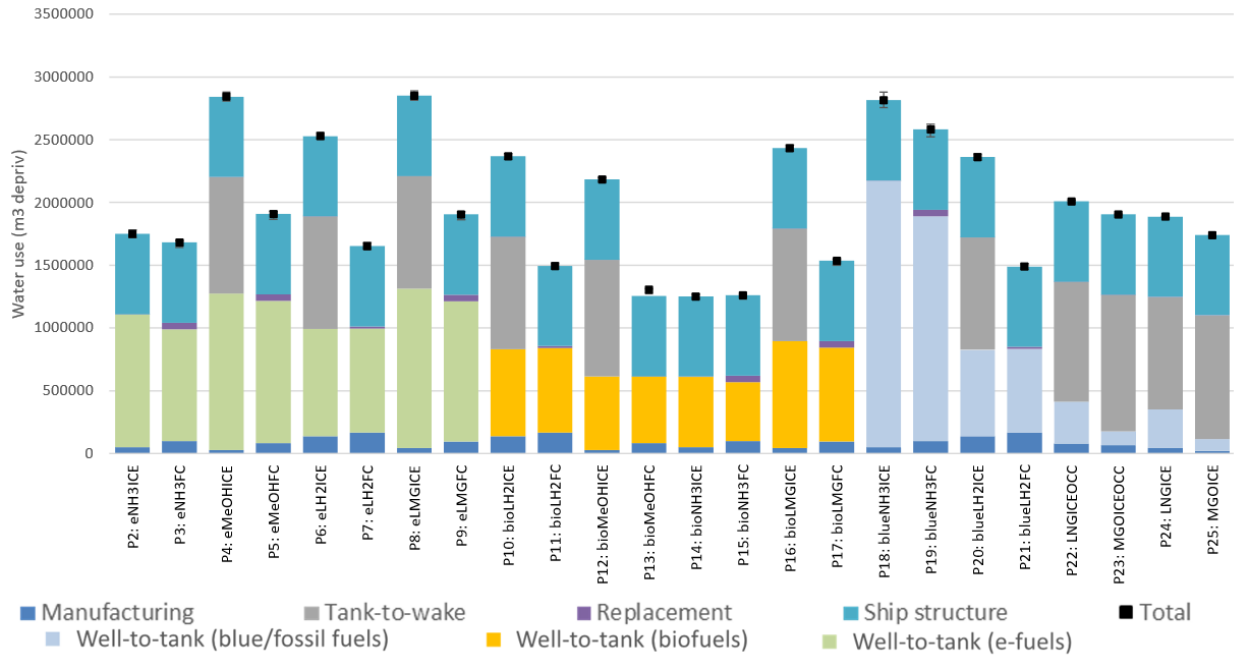

Figure S 20-LCA result on impact category- water use

### S5.2 Monte-carlo simulation box plot for CAC

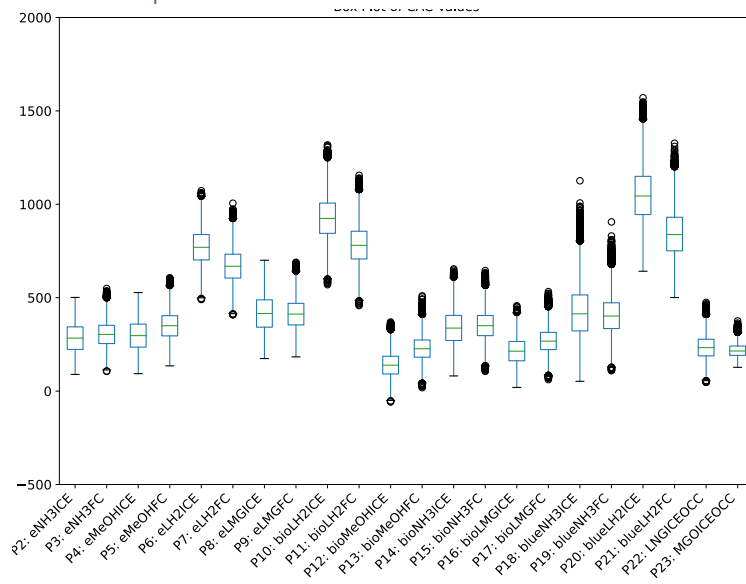

Figure S 21: CAC box plot for bulk carrier.

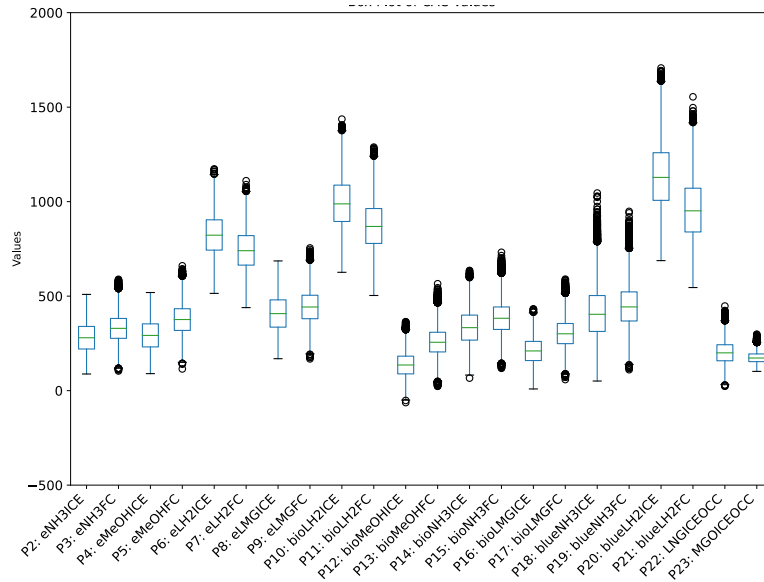

Figure S 22: CAC box plot for container

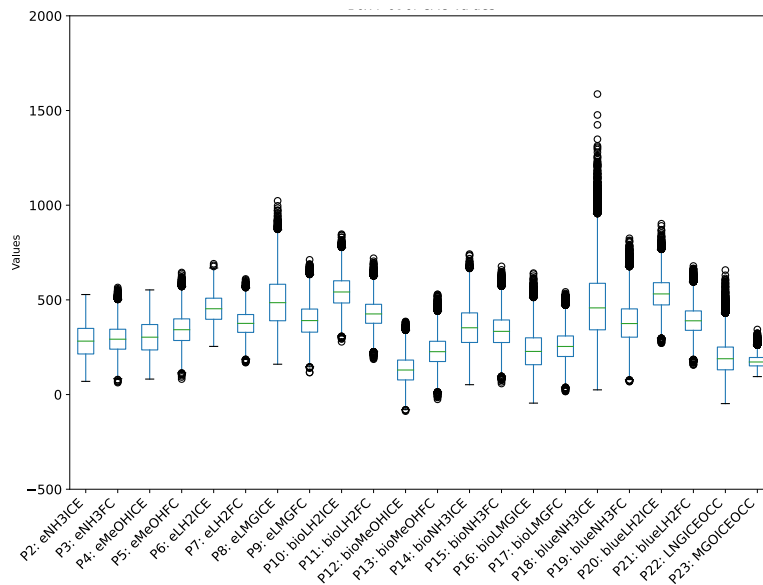

Figure S 23: Box plot for cruise ship.

- [1] F. M. Kanchiralla, "Life cycle navigation through future energy carriers and propulsion options for the energy transition in shipping," Licentiate of Engineering Licentiate, Department of Mechanics and Maritime Sciences, Chalmers University of Technology, Gothenburg, Sweden, Technical report no 2023:05., 2023.
- [2] R. Arvidsson *et al.*, "Environmental Assessment of Emerging Technologies: Recommendations for Prospective LCA," *Journal of Industrial Ecology*, vol. 22, no. 6, pp. 1286-1294, 2018, doi: <https://doi.org/10.1111/jiec.12690>.

- [3] I. AR6, "Climate Change 2021: The Physical Science Basis. Sixth Assessment Report of the Intergovernmental Panel on Climate Change ", 2021.
- [4] L. Zampori and P. rana, "Suggestions for updating the Product Environmental Footprint (PEF) method, EUR 29682 EN," Luxembourg, 2019.
- [5] Serenella Sala, Eleonora Crenna, Michela Secchi, and R. Pant, "Global normalisation factors for the environmental footprint and life cycle assessment," European Commission, Joint Research Centre, ISBN 978-92-79-77213-9, 2017.
- [6] Serenella Sala, Alessandro Kim Cerutti, and R. Pant, "Development of a weighting approach for the Environmental Footprint," European Commission, Joint Research Centre, ISBN 978-92-79-68042-7, 2018.
- [7] R. Sacchi *et al.*, "PRospective EnvironMental Impact asSEment (premise): A streamlined approach to producing databases for prospective life cycle assessment using integrated assessment models," *Renewable and Sustainable Energy Reviews*, vol. 160, 2022, doi: 10.1016/j.rser.2022.112311.
- [8] L. Baumstark *et al.*, "REMIND2.1: transformation and innovation dynamics of the energy-economic system within climate and sustainability limits," *Geoscientific Model Development*, vol. 14, no. 10, pp. 6571-6603, 2021, doi: 10.5194/gmd-14-6571-2021.
- [9] F. M. Kanchiralla, S. Brynolf, T. Olsson, J. Ellis, J. Hansson, and M. Grahn, "How do variations in ship operation impact the techno-economic feasibility and environmental performance of fossil-free fuels? A life cycle study," *Applied Energy*, vol. 350, 2023, doi: 10.1016/j.apenergy.2023.121773.
- [10] F. M. Kanchiralla, S. Brynolf, E. Malmgren, J. Hansson, and M. Grahn, "Life-Cycle Assessment and Costing of Fuels and Propulsion Systems in Future Fossil-Free Shipping," *Environ Sci Technol*, vol. 56, no. 17, pp. 12517-12531, Sep 6 2022, doi: 10.1021/acs.est.2c03016.
- [11] A. Sternberg and A. Bardow, "Life Cycle Assessment of Power-to-Gas: Syngas vs Methane," *ACS Sustainable Chemistry & Engineering*, vol. 4, no. 8, pp. 4156-4165, 2016, doi: 10.1021/acssuschemeng.6b00644.
- [12] P. Balcombe, K. Anderson, J. Speirs, N. Brandon, and A. Hawkes, "The Natural Gas Supply Chain: The Importance of Methane and Carbon Dioxide Emissions," *ACS Sustainable Chemistry & Engineering*, vol. 5, no. 1, pp. 3-20, 2016, doi: 10.1021/acssuschemeng.6b00144.
- [13] N. Gerloff, "Comparative Life-Cycle Assessment Analysis of Power-to-Methane Plants Including Different Water Electrolysis Technologies and CO<sub>2</sub> Sources While Applying Various Energy Scenarios," *ACS Sustainable Chemistry & Engineering*, vol. 9, no. 30, pp. 10123-10141, 2021, doi: 10.1021/acssuschemeng.1c02002.
- [14] C. Antonini, K. Treyer, A. Streb, M. van der Spek, C. Bauer, and M. Mazzotti, "Hydrogen production from natural gas and biomethane with carbon capture and storage – A techno-environmental analysis," *Sustainable Energy & Fuels*, vol. 4, no. 6, pp. 2967-2986, 2020, doi: 10.1039/d0se00222d.
- [15] F. M. Kanchiralla, S. Brynolf, E. Malmgren, and M. Grahn, "Can Shipping Contribute to Negative CO<sub>2</sub> Emissions?," in *2nd International Conference on Negative CO<sub>2</sub> Emissions Göteborg, Sweden June 14-17 2022*, 2022.
- [16] S. C. D'Angelo *et al.*, "Planetary Boundaries Analysis of Low-Carbon Ammonia Production Routes," *ACS Sustainable Chemistry & Engineering*, vol. 9, no. 29, pp. 9740-9749, 2021, doi: 10.1021/acssuschemeng.1c01915.
- [17] C. Antonini, K. Treyer, E. Moioli, C. Bauer, T. J. Schildhauer, and M. Mazzotti, "Hydrogen from wood gasification with CCS – a techno-environmental analysis of production and use as transport fuel," *Sustainable Energy & Fuels*, vol. 5, no. 10, pp. 2602-2621, 2021, doi: 10.1039/d0se01637c.
- [18] S. E. Tanzer, J. Posada, S. Geraedts, and A. Ramírez, "Lignocellulosic marine biofuel: Technoeconomic and environmental assessment for production in Brazil and Sweden," *Journal of Cleaner Production*, vol. 239, 2019, doi: 10.1016/j.jclepro.2019.117845.

- [19] S. C. Galusnyak, L. Petrescu, D. A. Chisalita, C.-C. Cormos, and M. Ugolini, "From Secondary Biomass to Bio-Methanol through CONVERGE Technology: An Environmental Analysis," *Energies*, vol. 16, no. 6, 2023, doi: 10.3390/en16062726.
- [20] A. D. Korberg, S. Brynolf, M. Grahn, and I. R. Skov, "Techno-economic assessment of advanced fuels and propulsion systems in future fossil-free ships," (in English), *Renew Sust Energ Rev*, vol. 142, May 2021, doi: 10.1016/j.rser.2021.110861.
- [21] L. Irlam, "Global costs of carbon capture and storage," Global CCS institute, 2017.
- [22] J. A. Ros *et al.*, "Advancements in ship-based carbon capture technology on board of LNG-fuelled ships," *International Journal of Greenhouse Gas Control*, vol. 114, 2022, doi: 10.1016/j.ijggc.2021.103575.
- [23] B. Thaler *et al.*, "Optimal design and operation of maritime energy systems based on renewable methanol and closed carbon cycles," *Energy Conversion and Management*, vol. 269, 2022, doi: 10.1016/j.enconman.2022.116064.
- [24] M. Feenstra, J. Monteiro, J. T. van den Akker, M. R. M. Abu-Zahra, E. Gilling, and E. Goetheer, "Ship-based carbon capture onboard of diesel or LNG-fuelled ships," *International Journal of Greenhouse Gas Control*, vol. 85, pp. 1-10, 2019, doi: 10.1016/j.ijggc.2019.03.008.
- [25] S. Brynolf *et al.*, "Nordic Roadmap Publication No.1-C/1/2022," 2022.
- [26] M. Taljegard, S. Brynolf, M. Grahn, K. Andersson, and H. Johnson, "Cost-Effective Choices of Marine Fuels in a Carbon-Constrained World: Results from a Global Energy Model," *Environ. Sci. Technol.*, vol. 48, no. 21, pp. 12986-12993, 2014/11/04 2014, doi: 10.1021/es5018575.
- [27] K. Holmgren *et al.*, "KNOGA. Fossilfri framdrift för tunga långväga transporter på väg – Kostnadsfördelning och risker för olika aktörer," FDOS 13:2021, 2021. [Online]. Available: <https://f3centre.se/sv/samverkansprogram/>
- [28] S. Deutz and A. Bardow, "Life-cycle assessment of an industrial direct air capture process based on temperature–vacuum swing adsorption," *Nature Energy*, vol. 6, no. 2, pp. 203-213, 2021, doi: 10.1038/s41560-020-00771-9.
- [29] Danish Energy Agency, "Technology Data – Carbon Capture, Transport and Storage, November 2021," Copenhagen, 2021.
- [30] J. Q. Mathieu Delpierre, Jan Mertens, Anne Prieur-Vernat, Stefano Cucurachi, "Assessing the environmental impacts of wind-based hydrogen production in the Netherlands using ex-ante LCA and scenarios analysis," *Journal of Cleaner Production*, vol. 299, 2021.
- [31] Danish Energy Agency, "Technology data for renewable fuels. Updated July 2020," Copenhagen, 2017.
- [32] K. Stolzenburg and R. Mubbala, "Integrated Design for Demonstration of Efficient Liquefaction of Hydrogen (IDEALHY Deliverable 3.16)," Fuel Cells and Hydrogen Joint Undertaking (FCH JU), 16 December 2013.
- [33] C. Smith, A. K. Hill, and L. Torrente-Murciano, "Current and future role of Haber–Bosch ammonia in a carbon-free energy landscape," *Energy & Environmental Science*, vol. 13, no. 2, pp. 331-344, 2020, doi: 10.1039/c9ee02873k.
- [34] S. A. Noshewani and R. C. Neto, "Techno-economic assessment of commercial ammonia synthesis methods in coastal areas of Germany," *Journal of Energy Storage*, vol. 34, 2021, doi: 10.1016/j.est.2020.102201.
- [35] A. A. Kiss, J. J. Pragt, H. J. Vos, G. Bargeman, and M. T. de Groot, "Novel efficient process for methanol synthesis by CO<sub>2</sub> hydrogenation," *Chemical Engineering Journal*, vol. 284, pp. 260-269, 2016, doi: 10.1016/j.cej.2015.08.101.
- [36] Y. Gu, D. Wang, Q. Chen, and Z. Tang, "Techno-economic analysis of green methanol plant with optimal design of renewable hydrogen production: A case study in China," *International Journal of Hydrogen Energy*, vol. 47, no. 8, pp. 5085-5100, 2022, doi: 10.1016/j.ijhydene.2021.11.148.
- [37] M. Grahn *et al.*, "Review of electrofuel feasibility—cost and environmental impact," *Progress in Energy*, vol. 4, no. 3, p. 032010, 2022/06/29 2022, doi: 10.1088/2516-1083/ac7937.

- [38] H. K. Jeswani, A. Chilvers, and A. Azapagic, "Environmental sustainability of biofuels: a review," *Proc Math Phys Eng Sci*, vol. 476, no. 2243, p. 20200351, Nov 2020, doi: 10.1098/rspa.2020.0351.
- [39] A. Susmozas, D. Iribarren, and J. Dufour, "Life-cycle performance of indirect biomass gasification as a green alternative to steam methane reforming for hydrogen production," *International Journal of Hydrogen Energy*, vol. 38, no. 24, pp. 9961-9972, 2013, doi: 10.1016/j.ijhydene.2013.06.012.
- [40] G. Wernet, C. Bauer, B. Steubing, J. Reinhard, E. Moreno-Ruiz, and B. Weidema, "The ecoinvent database version 3 (part I): overview and methodology," *The International Journal of Life Cycle Assessment*, vol. 21, no. 9, pp. 1218-1230, 2016/09/01 2016, doi: 10.1007/s11367-016-1087-8.
- [41] I. A. M. INSTITUTE, "Innovation Outlook : Renewable Methanol," no. ISBN 978-92-9260-320-5, 2021.
- [42] C. Lodato, L. Hamelin, D. Tonini, and T. F. Astrup, "Towards sustainable methane supply from local bioresources: Anaerobic digestion, gasification, and gas upgrading," *Applied Energy*, vol. 323, 2022, doi: 10.1016/j.apenergy.2022.119568.
- [43] P. Mayer *et al.*, "Blue and green ammonia production: A techno-economic and life cycle assessment perspective," *iScience*, vol. 26, no. 8, p. 107389, Aug 18 2023, doi: 10.1016/j.isci.2023.107389.
- [44] M. Katebah, M. m. Al-Rawashdeh, and P. Linke, "Analysis of hydrogen production costs in Steam-Methane Reforming considering integration with electrolysis and CO<sub>2</sub> capture," *Cleaner Engineering and Technology*, vol. 10, 2022, doi: 10.1016/j.clet.2022.100552.
- [45] M. Fasihi, O. Efimova, and C. Breyer, "Techno-economic assessment of CO<sub>2</sub> direct air capture plants," *Journal of Cleaner Production*, vol. 224, pp. 957-980, 2019, doi: 10.1016/j.jclepro.2019.03.086.
- [46] NCE Maritime CleanTech, "Norwegian future value chains for liquid hydrogen," 2019.
- [47] M. Arfan, O. Eriksson, Z. Wang, and S. Soam, "Life cycle assessment and life cycle costing of hydrogen production from biowaste and biomass in Sweden," *Energy Conversion and Management*, vol. 291, 2023, doi: 10.1016/j.enconman.2023.117262.
- [48] M. H. Ali Khan, R. Daiyan, P. Neal, N. Haque, I. MacGill, and R. Amal, "A framework for assessing economics of blue hydrogen production from steam methane reforming using carbon capture storage & utilisation," *International Journal of Hydrogen Energy*, vol. 46, no. 44, pp. 22685-22706, 2021, doi: 10.1016/j.ijhydene.2021.04.104.
